# Supplementary material for: The European Stag Beetle (Lucanus cervus) Monitoring Network: International Citizen Science Cooperation Reveals Regional Differences in Phenology and Temperature Response
Source: Insects. 2021 Sep 10;12(9):813. doi: 10.3390/insects12090813 (PMC8466357; doi:10.3390/insects12090813)
Supplement: Supplementary file 1 [file insects-12-00813-s001.zip › Table S1.xlsx]

## Sheet: transectwalkN
region	country	date	transect.name	observations	temp	moy	starttime	latitude	longitude
North	Belgium	2019-06-23	Bovenheide	9	25	5.8	20	50.753	4.28339
North	Belgium	2019-06-30	Bovenheide	0	24	6.03333	21	50.753	4.28339
North	Belgium	2019-07-09	Bovenheide	8	19	6.33333	24	50.753	4.28339
North	Belgium	2020-06-23	Bovenheide	6	13	5.83333	-16	50.753	4.28339
North	Belgium	2020-07-06	Bovenheide	0	16	6.26667	-18	50.753	4.28339
North	Belgium	2016-06-13	Drogenberg	0	14	5.5	-27	50.772	4.52746
North	Belgium	2016-06-16	Drogenberg	0	15	5.6	-28	50.772	4.52746
North	Belgium	2016-06-23	Drogenberg	1	28	5.83333	-75	50.772	4.52746
North	Belgium	2016-06-25	Drogenberg	0	13.5	5.9	-30	50.772	4.52746
North	Belgium	2016-06-29	Drogenberg	1	19	6.03333	-30	50.772	4.52746
North	Belgium	2016-07-20	Drogenberg	1	28	6.73333	-25	50.772	4.52746
North	Belgium	2016-07-22	Drogenberg	0	26.5	6.8	-27	50.772	4.52746
North	Belgium	2018-06-20	Drogenberg	1	21	5.7	-49	50.772	4.52746
North	Belgium	2020-06-15	Drogenberg	16	20	5.56667	-4	50.772	4.52746
North	Belgium	2020-06-20	Drogenberg	13	18	5.73333	0	50.772	4.52746
North	Belgium	2020-06-26	Drogenberg	12	23	5.93333	3	50.772	4.52746
North	Belgium	2020-07-03	Drogenberg	9	18	6.16667	-1	50.772	4.52746
North	Belgium	2020-07-10	Drogenberg	0	15	6.4	-1	50.772	4.52746
North	Belgium	2020-07-17	Drogenberg	3	19	6.63333	-1	50.772	4.52746
North	Belgium	2012-06-05	Kerkeveldweg	0	15	5.23333	-16	50.7358	4.33138
North	Belgium	2012-06-14	Kerkeveldweg	0	17	5.53333	-17	50.7358	4.33138
North	Belgium	2012-06-26	Kerkeveldweg	5	21	5.93333	-16	50.7358	4.33138
North	Belgium	2012-07-03	Kerkeveldweg	5	24	6.16667	-16	50.7358	4.33138
North	Belgium	2012-07-11	Kerkeveldweg	0	16	6.43333	-14	50.7358	4.33138
North	Belgium	2012-07-18	Kerkeveldweg	0	17	6.66667	-16	50.7358	4.33138
North	Belgium	2012-07-25	Kerkeveldweg	3	20	6.9	-14	50.7358	4.33138
North	Belgium	2012-08-07	Kerkeveldweg	0	21	7.33333	-15	50.7358	4.33138
North	Belgium	2012-08-15	Kerkeveldweg	1	24	7.6	-13	50.7358	4.33138
North	Belgium	2012-08-20	Kerkeveldweg	0	26	7.76667	-17	50.7358	4.33138
North	Belgium	2013-05-27	Kerkeveldweg	0	16	4.9	-30	50.7358	4.33138
North	Belgium	2013-06-06	Kerkeveldweg	0	17	5.23333	-30	50.7358	4.33138
North	Belgium	2013-06-11	Kerkeveldweg	0	17	5.4	-31	50.7358	4.33138
North	Belgium	2013-06-17	Kerkeveldweg	1	24	5.6	-30	50.7358	4.33138
North	Belgium	2013-06-26	Kerkeveldweg	3	17	5.9	-31	50.7358	4.33138
North	Belgium	2013-07-02	Kerkeveldweg	15	19.5	6.1	-14	50.7358	4.33138
North	Belgium	2013-07-08	Kerkeveldweg	3	23	6.3	-16	50.7358	4.33138
North	Belgium	2013-07-15	Kerkeveldweg	1	19	6.53333	-11	50.7358	4.33138
North	Belgium	2013-07-17	Kerkeveldweg	1	18	6.6	-31	50.7358	4.33138
North	Belgium	2013-07-22	Kerkeveldweg	3	26	6.76667	-31	50.7358	4.33138
North	Belgium	2013-07-31	Kerkeveldweg	0	22	7.06667	-31	50.7358	4.33138
North	Belgium	2013-08-06	Kerkeveldweg	0	21	7.26667	-31	50.7358	4.33138
North	Belgium	2013-08-12	Kerkeveldweg	0	21	7.46667	-32	50.7358	4.33138
North	Belgium	2013-08-21	Kerkeveldweg	0	21	7.76667	-33	50.7358	4.33138
North	Belgium	2018-06-10	Kerkeveldweg	20	20	5.36667	5	50.7358	4.33138
North	Belgium	2018-06-18	Kerkeveldweg	12	19	5.63333	1	50.7358	4.33138
North	Belgium	2018-06-27	Kerkeveldweg	3	19	5.93333	-1	50.7358	4.33138
North	Belgium	2018-06-28	Kerkeveldweg	4	20	5.96667	0	50.7358	4.33138
North	Belgium	2018-07-06	Kerkeveldweg	4	23	6.23333	12	50.7358	4.33138
North	Belgium	2019-06-18	Kerkeveldweg	13	16	5.63333	-9	50.7358	4.33138
North	Belgium	2019-06-23	Kerkeveldweg	24	17	5.8	11	50.7358	4.33138
North	Belgium	2019-07-01	Kerkeveldweg	2	17	6.06667	30	50.7358	4.33138
North	Belgium	2019-07-02	Kerkeveldweg	0	18	6.1	30	50.7358	4.33138
North	Belgium	2020-06-13	Kerkeveldweg	6	20	5.5	-27	50.7358	4.33138
North	Belgium	2020-06-24	Kerkeveldweg	10	20	5.86667	-1	50.7358	4.33138
North	Belgium	2020-06-19	Reutenbeek	0	19	5.7	2	50.7584	4.53664
North	Belgium	2020-06-24	Reutenbeek	1	23	5.86667	27	50.7584	4.53664
North	Belgium	2020-07-03	Reutenbeek	0	17	6.16667	17	50.7584	4.53664
North	Belgium	2020-07-10	Reutenbeek	1	14	6.4	17	50.7584	4.53664
North	Belgium	2020-07-17	Reutenbeek	0	19	6.63333	26	50.7584	4.53664
North	Belgium	2020-07-20	Reutenbeek	0	17	6.73333	17	50.7584	4.53664
North	Belgium	2012-05-22	Solheide	0	20	4.76667	-14	50.7741	4.53553
North	Belgium	2012-05-30	Solheide	0	24	5.03333	-15	50.7741	4.53553
North	Belgium	2012-06-05	Solheide	0	15	5.23333	-15	50.7741	4.53553
North	Belgium	2012-06-14	Solheide	0	17	5.53333	-14	50.7741	4.53553
North	Belgium	2012-06-20	Solheide	7	18.5	5.73333	1	50.7741	4.53553
North	Belgium	2012-06-23	Solheide	1	26	5.83333	-35	50.7741	4.53553
North	Belgium	2012-06-30	Solheide	3	16	6.06667	-14	50.7741	4.53553
North	Belgium	2012-07-02	Solheide	6	19	6.13333	-15	50.7741	4.53553
North	Belgium	2012-07-17	Solheide	2	18	6.63333	-15	50.7741	4.53553
North	Belgium	2012-08-06	Solheide	0	15	7.3	-16	50.7741	4.53553
North	Belgium	2012-08-15	Solheide	0	18	7.6	-16	50.7741	4.53553
North	Belgium	2016-06-26	Solheide	11	13	5.93333	-15	50.7741	4.53553
North	Belgium	2016-08-22	Solheide	0	18	7.83333	-17	50.7741	4.53553
North	Belgium	2018-06-07	Solheide	0	19	5.26667	-15	50.7741	4.53553
North	Belgium	2018-06-13	Solheide	1	13	5.46667	-15	50.7741	4.53553
North	Belgium	2018-06-21	Solheide	0	16	5.73333	-16	50.7741	4.53553
North	Belgium	2018-06-28	Solheide	1	23	5.96667	-15	50.7741	4.53553
North	Belgium	2019-06-05	Solheide	0	16	5.2	-15	50.7741	4.53553
North	Belgium	2019-06-15	Solheide	1	18	5.53333	0	50.7741	4.53553
North	Belgium	2019-06-27	Solheide	6	26	5.93333	-19	50.7741	4.53553
North	Belgium	2019-07-06	Solheide	2	21	6.23333	-11	50.7741	4.53553
North	Belgium	2019-07-12	Solheide	0	17	6.43333	-5	50.7741	4.53553
North	Belgium	2019-07-19	Solheide	1	18	6.66667	-12	50.7741	4.53553
North	Belgium	2019-07-25	Solheide	0	26	6.86667	-18	50.7741	4.53553
North	Belgium	2020-06-22	Solheide	3	22	5.8	-12	50.7741	4.53553
North	Belgium	2020-07-01	Solheide	2	19	6.1	-16	50.7741	4.53553
North	Belgium	2020-07-09	Solheide	1	22	6.36667	-36	50.7741	4.53553
North	Belgium	2020-07-16	Solheide	0	17	6.6	-16	50.7741	4.53553
North	Belgium	2020-07-22	Solheide	1	19	6.8	-16	50.7741	4.53553
North	Belgium	2020-07-30	Solheide	0	26	7.06667	-16	50.7741	4.53553
North	Belgium	2015-06-29	Speelberg	3	20	6	6	50.7616	4.53014
North	Belgium	2015-07-06	Speelberg	1	21	6.23333	4	50.7616	4.53014
North	Belgium	2015-07-13	Speelberg	1	20	6.46667	4	50.7616	4.53014
North	Belgium	2015-07-21	Speelberg	0	21	6.73333	4	50.7616	4.53014
North	Belgium	2016-06-22	Speelberg	9	20	5.8	4	50.7616	4.53014
North	Belgium	2016-07-04	Speelberg	13	20	6.2	4	50.7616	4.53014
North	Belgium	2016-07-10	Speelberg	9	22	6.4	4	50.7616	4.53014
North	Belgium	2016-07-18	Speelberg	1	23	6.66667	7	50.7616	4.53014
North	Belgium	2016-07-25	Speelberg	0	20	6.9	3	50.7616	4.53014
North	Belgium	2017-06-12	Speelberg	13	21	5.43333	6	50.7616	4.53014
North	Belgium	2017-06-19	Speelberg	4	24.5	5.66667	4	50.7616	4.53014
North	Belgium	2017-07-04	Speelberg	3	22	6.16667	4	50.7616	4.53014
North	Belgium	2017-07-13	Speelberg	0	20	6.46667	3	50.7616	4.53014
North	Belgium	2018-06-11	Speelberg	0	7	5.4	4	50.7616	4.53014
North	Belgium	2018-06-19	Speelberg	1	19	5.66667	4	50.7616	4.53014
North	Belgium	2018-06-26	Speelberg	0	21	5.9	4	50.7616	4.53014
North	Belgium	2018-07-02	Speelberg	0	21	6.1	3	50.7616	4.53014
North	Belgium	2019-06-25	Speelberg	4	26	5.86667	-16	50.7616	4.53014
North	Belgium	2019-07-01	Speelberg	1	17	6.06667	-16	50.7616	4.53014
North	Belgium	2019-07-09	Speelberg	0	17	6.33333	-17	50.7616	4.53014
North	Belgium	2020-06-25	Theresiastraat	2	24	5.9	1	50.7545	4.27502
North	Belgium	2020-07-02	Theresiastraat	1	17	6.13333	-10	50.7545	4.27502
North	Belgium	2020-07-09	Theresiastraat	1	17	6.36667	-16	50.7545	4.27502
North	Belgium	2020-07-15	Theresiastraat	0	17	6.56667	14	50.7545	4.27502
North	Belgium	2012-05-24	Watermolenstraat	0	25	4.83333	-30	50.7502	4.27937
North	Belgium	2012-05-30	Watermolenstraat	1	21	5.03333	-31	50.7502	4.27937
North	Belgium	2012-06-05	Watermolenstraat	0	9	5.23333	-16	50.7502	4.27937
North	Belgium	2012-06-11	Watermolenstraat	0	18	5.43333	-15	50.7502	4.27937
North	Belgium	2012-06-26	Watermolenstraat	11	22	5.93333	-16	50.7502	4.27937
North	Belgium	2012-07-04	Watermolenstraat	5	23.5	6.2	-16	50.7502	4.27937
North	Belgium	2012-07-10	Watermolenstraat	3	18	6.4	-16	50.7502	4.27937
North	Belgium	2012-07-17	Watermolenstraat	3	20	6.63333	-15	50.7502	4.27937
North	Belgium	2012-07-31	Watermolenstraat	3	24	7.1	-17	50.7502	4.27937
North	Belgium	2012-08-07	Watermolenstraat	0	20	7.33333	-17	50.7502	4.27937
North	Belgium	2012-08-15	Watermolenstraat	7	25	7.6	-17	50.7502	4.27937
North	Belgium	2012-08-20	Watermolenstraat	2	21	7.76667	-18	50.7502	4.27937
North	Belgium	2013-06-05	Watermolenstraat	0	17	5.2	-30	50.7502	4.27937
North	Belgium	2013-06-12	Watermolenstraat	0	20	5.43333	-31	50.7502	4.27937
North	Belgium	2013-06-12	Watermolenstraat	0	20	5.43333	-31	50.7502	4.27937
North	Belgium	2013-06-18	Watermolenstraat	1	20	5.63333	-31	50.7502	4.27937
North	Belgium	2015-06-04	Watermolenstraat	2	20	5.16667	15	50.7502	4.27937
North	Belgium	2015-06-11	Watermolenstraat	4	22	5.4	-1	50.7502	4.27937
North	Belgium	2015-06-18	Watermolenstraat	0	15	5.63333	1	50.7502	4.27937
North	Belgium	2015-06-24	Watermolenstraat	21	18	5.83333	-1	50.7502	4.27937
North	Belgium	2015-07-02	Watermolenstraat	4	26	6.1	0	50.7502	4.27937
North	Belgium	2015-07-16	Watermolenstraat	4	25	6.56667	19	50.7502	4.27937
North	Belgium	2016-06-24	Watermolenstraat	10	21	5.86667	29	50.7502	4.27937
North	Belgium	2016-07-19	Watermolenstraat	1	26.5	6.7	28	50.7502	4.27937
North	Belgium	2016-07-20	Watermolenstraat	0	26	6.73333	29	50.7502	4.27937
North	Belgium	2016-07-21	Watermolenstraat	0	23.5	6.76667	35	50.7502	4.27937
North	Belgium	2017-05-24	Watermolenstraat	0	17	4.8	-15	50.7502	4.27937
North	Belgium	2017-05-24	Watermolenstraat	0	17	4.8	-15	50.7502	4.27937
North	Belgium	2017-06-11	Watermolenstraat	12	24	5.4	-16	50.7502	4.27937
North	Belgium	2017-06-14	Watermolenstraat	24	23	5.5	-16	50.7502	4.27937
North	Belgium	2017-07-06	Watermolenstraat	0	24	6.23333	2	50.7502	4.27937
North	Belgium	2019-06-14	Watermolenstraat	4	21	5.5	-13	50.7502	4.27937
North	Belgium	2019-06-23	Watermolenstraat	23	26	5.8	-16	50.7502	4.27937
North	Belgium	2019-06-30	Watermolenstraat	3	24.5	6.03333	-15	50.7502	4.27937
North	Belgium	2019-07-09	Watermolenstraat	0	19	6.33333	-11	50.7502	4.27937
North	Belgium	2020-06-15	Watermolenstraat	0	22	5.56667	-15	50.7502	4.27937
North	Belgium	2020-06-16	Watermolenstraat	0	20	5.6	-16	50.7502	4.27937
North	Belgium	2020-06-18	Watermolenstraat	0	18	5.66667	-16	50.7502	4.27937
North	Belgium	2020-06-23	Watermolenstraat	5	23.5	5.83333	-16	50.7502	4.27937
North	Belgium	2020-06-24	Watermolenstraat	6	26	5.86667	-16	50.7502	4.27937
North	Belgium	2020-06-25	Watermolenstraat	3	26.5	5.9	-16	50.7502	4.27937
North	Belgium	2020-06-29	Watermolenstraat	0	16	6.03333	-15	50.7502	4.27937
North	Belgium	2020-07-10	Watermolenstraat	1	18.5	6.4	-10	50.7502	4.27937
North	Belgium	2020-07-13	Watermolenstraat	3	18.5	6.5	-8	50.7502	4.27937
North	Belgium	2020-07-19	Watermolenstraat	0	20.5	6.7	-2	50.7502	4.27937
North	Germany	2017-05-28	Alf-Fabrik	3	20	4.93333	2	50.0593	7.106
North	Germany	2017-06-03	Alf-Fabrik	8	20	5.13333	-20	50.0593	7.106
North	Germany	2017-06-10	Alf-Fabrik	1	18	5.36667	-16	50.0593	7.106
North	Germany	2017-06-17	Alf-Fabrik	5	17	5.6	-4	50.0593	7.106
North	Germany	2017-06-23	Alf-Fabrik	2	21	5.8	-16	50.0593	7.106
North	Germany	2017-07-05	Alf-Fabrik	2	19	6.2	-14	50.0593	7.106
North	Germany	2017-05-27	Alf-Höllenthal	2	23	4.9	-12	50.0507	7.10441
North	Germany	2017-06-03	Alf-Höllenthal	2	21	5.13333	-20	50.0507	7.10441
North	Germany	2017-06-11	Alf-Höllenthal	7	22.5	5.4	-16	50.0507	7.10441
North	Germany	2017-06-15	Alf-Höllenthal	5	22	5.53333	-8	50.0507	7.10441
North	Germany	2017-06-23	Alf-Höllenthal	1	21	5.8	-16	50.0507	7.10441
North	Germany	2017-07-05	Alf-Höllenthal	0	19	6.2	-14	50.0507	7.10441
North	Germany	2018-05-28	Alf-Höllenthal	12	21	4.93333	-18	50.0507	7.10441
North	Germany	2018-05-30	Alf-Höllenthal	9	21	5	-20	50.0507	7.10441
North	Germany	2018-06-04	Alf-Höllenthal	2	20	5.16667	-20	50.0507	7.10441
North	Germany	2018-06-06	Alf-Höllenthal	5	21	5.23333	-22	50.0507	7.10441
North	Germany	2018-06-11	Alf-Höllenthal	0	17	5.4	-26	50.0507	7.10441
North	Germany	2018-06-18	Alf-Höllenthal	0	17	5.63333	-20	50.0507	7.10441
North	Germany	2018-06-25	Alf-Höllenthal	1	15	5.86667	-21	50.0507	7.10441
North	Germany	2019-06-01	Alf-Höllenthal	3	19	5.06667	-1	50.0507	7.10441
North	Germany	2019-06-02	Alf-Höllenthal	11	20	5.1	-3	50.0507	7.10441
North	Germany	2019-06-05	Alf-Höllenthal	4	20	5.2	-11	50.0507	7.10441
North	Germany	2019-06-09	Alf-Höllenthal	7	17	5.33333	-9	50.0507	7.10441
North	Germany	2019-06-14	Alf-Höllenthal	3	17.5	5.5	-13	50.0507	7.10441
North	Germany	2019-06-17	Alf-Höllenthal	1	18.5	5.6	-14	50.0507	7.10441
North	Germany	2019-06-19	Alf-Höllenthal	0	21	5.66667	-15	50.0507	7.10441
North	Germany	2019-06-24	Alf-Höllenthal	0	23	5.83333	-16	50.0507	7.10441
North	Germany	2019-07-02	Alf-Höllenthal	0	18.5	6.1	-10	50.0507	7.10441
North	Germany	2020-05-21	Alf-Höllenthal	0	20	4.73333	-30	50.0507	7.10441
North	Germany	2020-06-02	Alf-Höllenthal	13	22	5.13333	-9	50.0507	7.10441
North	Germany	2020-06-03	Alf-Höllenthal	5	18.5	5.16667	-10	50.0507	7.10441
North	Germany	2020-06-11	Alf-Höllenthal	9	16	5.43333	-14	50.0507	7.10441
North	Germany	2020-06-15	Alf-Höllenthal	10	16.5	5.56667	-14	50.0507	7.10441
North	Germany	2020-06-22	Alf-Höllenthal	2	17.5	5.8	-6	50.0507	7.10441
North	Germany	2020-06-25	Alf-Höllenthal	0	21	5.9	-16	50.0507	7.10441
North	Germany	2019-06-09	Dürrfelder Wald Langenlonsheim	24	22	5.33333	-16	49.9039	7.87636
North	Germany	2019-06-10	Dürrfelder Wald Langenlonsheim	4	21	5.36667	-21	49.9039	7.87636
North	Germany	2019-06-17	Dürrfelder Wald Langenlonsheim	2	20	5.6	-25	49.9039	7.87636
North	Germany	2019-06-30	Dürrfelder Wald Langenlonsheim	11	21	6.03333	-16	49.9039	7.87636
North	Germany	2020-05-27	Dürrfelder Wald Langenlonsheim	10	23	4.93333	-9	49.9039	7.87636
North	Germany	2020-06-01	Dürrfelder Wald Langenlonsheim	15	22	5.1	-14	49.9039	7.87636
North	Germany	2020-06-02	Dürrfelder Wald Langenlonsheim	14	26	5.13333	-15	49.9039	7.87636
North	Germany	2020-06-03	Dürrfelder Wald Langenlonsheim	9	20	5.16667	-6	49.9039	7.87636
North	Germany	2020-06-08	Dürrfelder Wald Langenlonsheim	9	18	5.33333	-15	49.9039	7.87636
North	Germany	2020-06-13	Dürrfelder Wald Langenlonsheim	21	25	5.5	-19	49.9039	7.87636
North	Germany	2020-06-16	Dürrfelder Wald Langenlonsheim	8	20	5.6	1	49.9039	7.87636
North	Germany	2020-06-18	Dürrfelder Wald Langenlonsheim	14	21	5.66667	1	49.9039	7.87636
North	Germany	2020-06-24	Dürrfelder Wald Langenlonsheim	11	27	5.86667	-12	49.9039	7.87636
North	Germany	2020-06-25	Dürrfelder Wald Langenlonsheim	12	24	5.9	-14	49.9039	7.87636
North	Germany	2020-07-06	Dürrfelder Wald Langenlonsheim	7	18	6.26667	-15	49.9039	7.87636
North	Germany	2020-07-18	Dürrfelder Wald Langenlonsheim	3	26	6.66667	-75	49.9039	7.87636
North	Germany	2020-07-19	Dürrfelder Wald Langenlonsheim	2	27	6.7	-19	49.9039	7.87636
North	Germany	2016-06-01	Schüttorf-Suddendorf	10	19	5.1	-19	52.2886	7.22754
North	Germany	2016-06-09	Schüttorf-Suddendorf	6	18	5.36667	-18	52.2886	7.22754
North	Germany	2016-06-22	Schüttorf-Suddendorf	6	22	5.8	-13	52.2886	7.22754
North	Germany	2016-07-03	Schüttorf-Suddendorf	3	19	6.16667	-16	52.2886	7.22754
North	Germany	2017-05-22	Schüttorf-Suddendorf	14	20	4.73333	-16	52.2886	7.22754
North	Germany	2017-05-30	Schüttorf-Suddendorf	7	21	5	-18	52.2886	7.22754
North	Germany	2017-06-04	Schüttorf-Suddendorf	2	20	5.16667	-19	52.2886	7.22754
North	Germany	2017-06-11	Schüttorf-Suddendorf	7	25	5.4	-18	52.2886	7.22754
North	Germany	2017-06-13	Schüttorf-Suddendorf	14	24	5.46667	-11	52.2886	7.22754
North	Germany	2017-06-15	Schüttorf-Suddendorf	13	22	5.53333	-16	52.2886	7.22754
North	Germany	2018-05-28	Schüttorf-Suddendorf	2	23	4.93333	-17	52.2886	7.22754
North	Germany	2018-06-05	Schüttorf-Suddendorf	13	25	5.2	-14	52.2886	7.22754
North	Germany	2018-06-06	Schüttorf-Suddendorf	2	20	5.23333	-3	52.2886	7.22754
North	Germany	2018-06-11	Schüttorf-Suddendorf	1	18	5.4	-18	52.2886	7.22754
North	Germany	2018-06-18	Schüttorf-Suddendorf	5	27	5.63333	-14	52.2886	7.22754
North	Germany	2018-06-25	Schüttorf-Suddendorf	7	28	5.86667	-16	52.2886	7.22754
North	Germany	2019-06-01	Schüttorf-Suddendorf	3	20	5.06667	-19	52.2886	7.22754
North	Germany	2020-05-21	Schüttorf-Suddendorf	1	19	4.73333	-15	52.2886	7.22754
North	Germany	2020-05-29	Schüttorf-Suddendorf	9	19	5	-18	52.2886	7.22754
North	Germany	2020-05-31	Schüttorf-Suddendorf	8	19	5.06667	-19	52.2886	7.22754
North	Germany	2020-06-02	Schüttorf-Suddendorf	11	21	5.13333	-20	52.2886	7.22754
North	Germany	2020-06-03	Schüttorf-Suddendorf	2	19	5.16667	-20	52.2886	7.22754
North	Germany	2020-06-04	Schüttorf-Suddendorf	3	12	5.2	-20	52.2886	7.22754
North	Germany	2020-06-10	Schüttorf-Suddendorf	4	19	5.4	-19	52.2886	7.22754
North	Germany	2020-06-11	Schüttorf-Suddendorf	3	17	5.43333	-19	52.2886	7.22754
North	Germany	2020-06-17	Schüttorf-Suddendorf	3	20	5.63333	-16	52.2886	7.22754
North	Germany	2020-06-19	Schüttorf-Suddendorf	16	21	5.7	-15	52.2886	7.22754
North	Germany	2020-06-25	Schüttorf-Suddendorf	3	22	5.9	-18	52.2886	7.22754
North	Poland	2016-06-02	Oak Alley in Gryżyna	0	20	5.13333	-20	52.1906	15.2793
North	Poland	2016-06-19	Oak Alley in Gryżyna	4	24	5.7	-18	52.1906	15.2793
North	Poland	2016-07-02	Oak Alley in Gryżyna	1	26	6.13333	-19	52.1906	15.2793
North	Poland	2016-07-11	Oak Alley in Gryżyna	1	25	6.43333	-16	52.1906	15.2793
North	Poland	2016-07-30	Oak Alley in Gryżyna	0	21	7.06667	-12	52.1906	15.2793
North	Poland	2016-06-02	Old Oakwood in Koryta	0	19	5.13333	-22	52.2679	15.1712
North	Poland	2016-06-19	Old Oakwood in Koryta	1	23	5.7	-19	52.2679	15.1712
North	Poland	2016-07-01	Old Oakwood in Koryta	4	26	6.1	-22	52.2679	15.1712
North	Poland	2016-07-11	Old Oakwood in Koryta	5	24	6.43333	-17	52.2679	15.1712
North	Poland	2016-07-30	Old Oakwood in Koryta	0	20	7.06667	-15	52.2679	15.1712
North	The Netherlands	2017-05-30	Eendenbeek	0	18	5	-17	52.4577	6.84364
North	The Netherlands	2017-06-05	Eendenbeek	0	19	5.2	-15	52.4577	6.84364
North	The Netherlands	2017-06-14	Eendenbeek	0	18	5.5	-15	52.4577	6.84364
North	The Netherlands	2017-06-26	Eendenbeek	1	15	5.9	-16	52.4577	6.84364
North	The Netherlands	2017-07-02	Eendenbeek	0	16	6.1	-16	52.4577	6.84364
North	The Netherlands	2018-06-03	Etzenrade-Jos	0	19	5.13333	11	50.9787	5.95703
North	The Netherlands	2018-06-10	Etzenrade-Jos	0	18	5.36667	1	50.9787	5.95703
North	The Netherlands	2018-06-17	Etzenrade-Jos	0	15	5.6	7	50.9787	5.95703
North	The Netherlands	2018-06-24	Etzenrade-Jos	2	17	5.83333	-2	50.9787	5.95703
North	The Netherlands	2018-07-01	Etzenrade-Jos	1	15	6.06667	-2	50.9787	5.95703
North	The Netherlands	2018-07-08	Etzenrade-Jos	2	16	6.3	2	50.9787	5.95703
North	The Netherlands	2018-07-15	Etzenrade-Jos	0	18	6.53333	9	50.9787	5.95703
North	The Netherlands	2018-07-22	Etzenrade-Jos	0	21	6.76667	9	50.9787	5.95703
North	The Netherlands	2018-07-29	Etzenrade-Jos	4	21	7	7	50.9787	5.95703
North	The Netherlands	2019-06-03	Etzenrade-Jos	0	18	5.13333	5	50.9787	5.95703
North	The Netherlands	2019-06-09	Etzenrade-Jos	0	18	5.33333	-4	50.9787	5.95703
North	The Netherlands	2019-06-23	Etzenrade-Jos	0	20	5.8	-7	50.9787	5.95703
North	The Netherlands	2019-06-30	Etzenrade-Jos	3	20	6.03333	-28	50.9787	5.95703
North	The Netherlands	2019-07-06	Etzenrade-Jos	3	15	6.23333	-16	50.9787	5.95703
North	The Netherlands	2019-07-21	Etzenrade-Jos	3	17	6.73333	-20	50.9787	5.95703
North	The Netherlands	2019-07-30	Etzenrade-Jos	0	18	7.03333	-4	50.9787	5.95703
North	The Netherlands	2020-06-07	Etzenrade-Jos	0	16	5.3	-11	50.9787	5.95703
North	The Netherlands	2020-06-21	Etzenrade-Jos	0	15	5.76667	-15	50.9787	5.95703
North	The Netherlands	2020-06-30	Etzenrade-Jos	0	12	6.06667	-16	50.9787	5.95703
North	The Netherlands	2020-07-05	Etzenrade-Jos	1	15	6.23333	-16	50.9787	5.95703
North	The Netherlands	2020-07-12	Etzenrade-Jos	2	15	6.46667	-16	50.9787	5.95703
North	The Netherlands	2020-07-19	Etzenrade-Jos	0	18	6.7	-16	50.9787	5.95703
North	The Netherlands	2020-07-26	Etzenrade-Jos	3	16	6.93333	-15	50.9787	5.95703
North	The Netherlands	2020-08-01	Etzenrade-Jos	1	18	7.13333	-17	50.9787	5.95703
North	The Netherlands	2020-08-09	Etzenrade-Jos	1	18	7.4	-20	50.9787	5.95703
North	The Netherlands	2019-06-12	Etzenrade-Ron	1	20	5.43333	NA	50.9788	5.94562
North	The Netherlands	2019-06-21	Etzenrade-Ron	2	18	5.73333	NA	50.9788	5.94562
North	The Netherlands	2019-06-27	Etzenrade-Ron	1	18	5.93333	NA	50.9788	5.94562
North	The Netherlands	2019-06-29	Etzenrade-Ron	7	32	6	-17	50.9788	5.94562
North	The Netherlands	2019-07-07	Etzenrade-Ron	14	20	6.26667	-16	50.9788	5.94562
North	The Netherlands	2019-07-14	Etzenrade-Ron	16	22	6.5	-16	50.9788	5.94562
North	The Netherlands	2019-07-17	Etzenrade-Ron	11	25	6.6	-18	50.9788	5.94562
North	The Netherlands	2020-07-07	Etzenrade-Ron	6	19	6.3	-10	50.9788	5.94562
North	The Netherlands	2020-07-13	Etzenrade-Ron	3	20	6.5	-10	50.9788	5.94562
North	The Netherlands	2020-07-21	Etzenrade-Ron	0	23	6.76667	3	50.9788	5.94562
North	The Netherlands	2020-08-08	Etzenrade-Ron	0	25	7.36667	28	50.9788	5.94562
North	The Netherlands	2020-08-14	Etzenrade-Ron	0	24	7.56667	-20	50.9788	5.94562
North	The Netherlands	2020-08-21	Etzenrade-Ron	4	26	7.8	-17	50.9788	5.94562
North	The Netherlands	2020-09-10	Etzenrade-Ron	1	16	8.46667	-17	50.9788	5.94562
North	The Netherlands	2017-05-29	Grensweg, Milsbeek	3	24	4.96667	-12	51.7387	5.96127
North	The Netherlands	2017-06-08	Grensweg, Milsbeek	16	20	5.3	-17	51.7387	5.96127
North	The Netherlands	2017-06-13	Grensweg, Milsbeek	10	16	5.46667	-26	51.7387	5.96127
North	The Netherlands	2017-06-17	Grensweg, Milsbeek	1	20	5.6	-27	51.7387	5.96127
North	The Netherlands	2017-06-26	Grensweg, Milsbeek	17	19	5.9	-30	51.7387	5.96127
North	The Netherlands	2017-07-05	Grensweg, Milsbeek	9	19	6.2	-27	51.7387	5.96127
North	The Netherlands	2017-07-18	Grensweg, Milsbeek	5	21	6.63333	24	51.7387	5.96127
North	The Netherlands	2017-07-19	Grensweg, Milsbeek	1	22	6.66667	-10	51.7387	5.96127
North	The Netherlands	2017-08-23	Grensweg, Milsbeek	1	24	7.83333	-15	51.7387	5.96127
North	The Netherlands	2018-05-08	Grensweg, Milsbeek	0	24	4.26667	-41	51.7387	5.96127
North	The Netherlands	2018-05-25	Grensweg, Milsbeek	3	23	4.83333	-15	51.7387	5.96127
North	The Netherlands	2018-05-30	Grensweg, Milsbeek	5	24	5	-15	51.7387	5.96127
North	The Netherlands	2018-06-06	Grensweg, Milsbeek	9	25	5.23333	-15	51.7387	5.96127
North	The Netherlands	2018-06-20	Grensweg, Milsbeek	18	24	5.7	-15	51.7387	5.96127
North	The Netherlands	2018-06-27	Grensweg, Milsbeek	23	23	5.93333	-16	51.7387	5.96127
North	The Netherlands	2018-06-30	Grensweg, Milsbeek	19	23	6.03333	-16	51.7387	5.96127
North	The Netherlands	2018-07-04	Grensweg, Milsbeek	9	22	6.16667	-16	51.7387	5.96127
North	The Netherlands	2018-07-08	Grensweg, Milsbeek	5	22	6.3	-16	51.7387	5.96127
North	The Netherlands	2018-07-15	Grensweg, Milsbeek	1	24	6.53333	-15	51.7387	5.96127
North	The Netherlands	2018-07-18	Grensweg, Milsbeek	0	20	6.63333	-16	51.7387	5.96127
North	The Netherlands	2019-05-31	Grensweg, Milsbeek	0	19	5.03333	-15	51.7387	5.96127
North	The Netherlands	2019-05-31	Grensweg, Milsbeek	0	19	5.03333	-15	51.7387	5.96127
North	The Netherlands	2019-06-02	Grensweg, Milsbeek	1	24	5.1	-15	51.7387	5.96127
North	The Netherlands	2019-06-02	Grensweg, Milsbeek	1	24	5.1	-15	51.7387	5.96127
North	The Netherlands	2019-06-05	Grensweg, Milsbeek	0	21	5.2	-15	51.7387	5.96127
North	The Netherlands	2019-06-05	Grensweg, Milsbeek	0	21	5.2	-15	51.7387	5.96127
North	The Netherlands	2019-06-09	Grensweg, Milsbeek	1	17	5.33333	-16	51.7387	5.96127
North	The Netherlands	2019-06-09	Grensweg, Milsbeek	1	17	5.33333	-16	51.7387	5.96127
North	The Netherlands	2019-06-11	Grensweg, Milsbeek	2	17	5.4	-15	51.7387	5.96127
North	The Netherlands	2019-06-11	Grensweg, Milsbeek	2	17	5.4	-30	51.7387	5.96127
North	The Netherlands	2019-06-17	Grensweg, Milsbeek	10	23	5.6	-16	51.7387	5.96127
North	The Netherlands	2019-06-17	Grensweg, Milsbeek	10	23	5.6	-16	51.7387	5.96127
North	The Netherlands	2019-06-22	Grensweg, Milsbeek	0	22	5.76667	-15	51.7387	5.96127
North	The Netherlands	2019-06-22	Grensweg, Milsbeek	0	22	5.76667	-15	51.7387	5.96127
North	The Netherlands	2019-06-25	Grensweg, Milsbeek	13	30	5.86667	-16	51.7387	5.96127
North	The Netherlands	2019-06-25	Grensweg, Milsbeek	13	30	5.86667	-16	51.7387	5.96127
North	The Netherlands	2019-07-11	Grensweg, Milsbeek	7	21	6.4	-16	51.7387	5.96127
North	The Netherlands	2019-07-11	Grensweg, Milsbeek	8	22	6.4	-16	51.7387	5.96127
North	The Netherlands	2019-07-17	Grensweg, Milsbeek	1	20	6.6	-17	51.7387	5.96127
North	The Netherlands	2019-07-17	Grensweg, Milsbeek	1	20	6.6	-17	51.7387	5.96127
North	The Netherlands	2019-07-23	Grensweg, Milsbeek	4	29	6.8	-17	51.7387	5.96127
North	The Netherlands	2019-07-23	Grensweg, Milsbeek	4	29	6.8	-17	51.7387	5.96127
North	The Netherlands	2020-05-07	Grensweg, Milsbeek	0	18	4.26667	-15	51.7387	5.96127
North	The Netherlands	2020-05-07	Grensweg, Milsbeek	0	18	4.26667	-15	51.7387	5.96127
North	The Netherlands	2020-05-20	Grensweg, Milsbeek	0	19	4.7	-14	51.7387	5.96127
North	The Netherlands	2020-05-20	Grensweg, Milsbeek	0	19	4.7	-14	51.7387	5.96127
North	The Netherlands	2020-05-21	Grensweg, Milsbeek	0	23	4.73333	45	51.7387	5.96127
North	The Netherlands	2020-05-21	Grensweg, Milsbeek	0	23	4.73333	45	51.7387	5.96127
North	The Netherlands	2020-05-30	Grensweg, Milsbeek	0	22	5.03333	-14	51.7387	5.96127
North	The Netherlands	2020-05-30	Grensweg, Milsbeek	0	22	5.03333	-14	51.7387	5.96127
North	The Netherlands	2020-05-31	Grensweg, Milsbeek	0	19	5.06667	-15	51.7387	5.96127
North	The Netherlands	2020-05-31	Grensweg, Milsbeek	0	19	5.06667	-15	51.7387	5.96127
North	The Netherlands	2020-06-12	Grensweg, Milsbeek	8	23	5.46667	-15	51.7387	5.96127
North	The Netherlands	2020-06-12	Grensweg, Milsbeek	8	23	5.46667	-15	51.7387	5.96127
North	The Netherlands	2020-06-15	Grensweg, Milsbeek	6	23	5.56667	-15	51.7387	5.96127
North	The Netherlands	2020-06-15	Grensweg, Milsbeek	6	23	5.56667	-15	51.7387	5.96127
North	The Netherlands	2020-06-19	Grensweg, Milsbeek	2	19	5.7	-16	51.7387	5.96127
North	The Netherlands	2020-06-19	Grensweg, Milsbeek	2	19	5.7	-16	51.7387	5.96127
North	The Netherlands	2020-06-23	Grensweg, Milsbeek	9	24	5.83333	-16	51.7387	5.96127
North	The Netherlands	2020-06-23	Grensweg, Milsbeek	8	24	5.83333	-16	51.7387	5.96127
North	The Netherlands	2020-06-26	Grensweg, Milsbeek	4	23	5.93333	-16	51.7387	5.96127
North	The Netherlands	2020-06-26	Grensweg, Milsbeek	4	23	5.93333	-16	51.7387	5.96127
North	The Netherlands	2020-07-05	Grensweg, Milsbeek	2	20	6.23333	-16	51.7387	5.96127
North	The Netherlands	2020-07-05	Grensweg, Milsbeek	2	20	6.23333	-16	51.7387	5.96127
North	The Netherlands	2020-07-13	Grensweg, Milsbeek	6	21	6.5	-16	51.7387	5.96127
North	The Netherlands	2020-07-13	Grensweg, Milsbeek	6	21	6.5	-16	51.7387	5.96127
North	The Netherlands	2020-07-17	Grensweg, Milsbeek	4	21	6.63333	-16	51.7387	5.96127
North	The Netherlands	2020-07-17	Grensweg, Milsbeek	4	21	6.63333	-16	51.7387	5.96127
North	The Netherlands	2020-07-19	Grensweg, Milsbeek	4	21	6.7	-17	51.7387	5.96127
North	The Netherlands	2020-07-19	Grensweg, Milsbeek	4	21	6.7	-17	51.7387	5.96127
North	The Netherlands	2020-07-27	Grensweg, Milsbeek	1	22	6.96667	-17	51.7387	5.96127
North	The Netherlands	2020-07-27	Grensweg, Milsbeek	1	22	6.96667	-17	51.7387	5.96127
North	The Netherlands	2019-06-02	Hoog Buurlo-Natasja	0	24.5	5.1	-16	52.1739	5.84584
North	The Netherlands	2019-06-05	Hoog Buurlo-Natasja	0	19	5.2	-16	52.1739	5.84584
North	The Netherlands	2019-06-14	Hoog Buurlo-Natasja	0	20	5.5	-9	52.1739	5.84584
North	The Netherlands	2019-06-18	Hoog Buurlo-Natasja	1	21	5.63333	-16	52.1739	5.84584
North	The Netherlands	2019-06-26	Hoog Buurlo-Natasja	0	19	5.9	-14	52.1739	5.84584
North	The Netherlands	2019-06-29	Hoog Buurlo-Natasja	1	23	6	6	52.1739	5.84584
North	The Netherlands	2019-07-13	Hoog Buurlo-Natasja	0	17	6.46667	-12	52.1739	5.84584
North	The Netherlands	2020-06-13	Hoog Buurlo-Natasja	3	22	5.5	-14	52.1739	5.84584
North	The Netherlands	2020-06-23	Hoog Buurlo-Natasja	1	27	5.83333	-17	52.1739	5.84584
North	The Netherlands	2020-07-02	Hoog Buurlo-Natasja	0	17	6.13333	-16	52.1739	5.84584
North	The Netherlands	2020-08-03	Hoog Buurlo-Natasja	0	16	7.2	NA	52.1739	5.84584
North	The Netherlands	2018-06-09	Hoog Buurlo-Tammo	1	14	5.33333	-4	52.1761	5.84664
North	The Netherlands	2018-06-15	Hoog Buurlo-Tammo	2	15	5.53333	-3	52.1761	5.84664
North	The Netherlands	2018-06-20	Hoog Buurlo-Tammo	4	15	5.7	-2	52.1761	5.84664
North	The Netherlands	2018-06-29	Hoog Buurlo-Tammo	2	15	6	-2	52.1761	5.84664
North	The Netherlands	2018-07-05	Hoog Buurlo-Tammo	1	16	6.2	NA	52.1761	5.84664
North	The Netherlands	2019-06-02	Hoog Buurlo-Tammo	5	24	5.1	-14	52.1761	5.84664
North	The Netherlands	2019-06-14	Hoog Buurlo-Tammo	1	18	5.5	-13	52.1761	5.84664
North	The Netherlands	2019-06-22	Hoog Buurlo-Tammo	1	18	5.76667	-17	52.1761	5.84664
North	The Netherlands	2019-06-25	Hoog Buurlo-Tammo	6	27	5.86667	-18	52.1761	5.84664
North	The Netherlands	2019-06-29	Hoog Buurlo-Tammo	2	25	6	-17	52.1761	5.84664
North	The Netherlands	2019-07-23	Hoog Buurlo-Tammo	0	26	6.8	-18	52.1761	5.84664
North	The Netherlands	2020-06-02	Hoog Buurlo-Tammo	4	24	5.13333	-15	52.1761	5.84664
North	The Netherlands	2020-06-12	Hoog Buurlo-Tammo	3	23	5.46667	-18	52.1761	5.84664
North	The Netherlands	2020-08-07	Hoog Buurlo-Tammo	0	28	7.33333	2	52.1761	5.84664
North	The Netherlands	2018-06-26	Hoog Soeren	0	14	5.9	NA	52.2226	5.87619
North	The Netherlands	2018-07-01	Hoog Soeren	0	18	6.06667	NA	52.2226	5.87619
North	The Netherlands	2018-07-03	Hoog Soeren	0	15	6.13333	NA	52.2226	5.87619
North	The Netherlands	2018-07-15	Hoog Soeren	0	18	6.53333	NA	52.2226	5.87619
North	The Netherlands	2018-07-16	Hoog Soeren	0	20	6.56667	NA	52.2226	5.87619
North	The Netherlands	2018-07-25	Hoog Soeren	0	21	6.86667	NA	52.2226	5.87619
North	The Netherlands	2019-06-02	Jabeek	0	16	5.1	-12	50.9694	5.94805
North	The Netherlands	2019-06-09	Jabeek	0	17	5.33333	-9	50.9694	5.94805
North	The Netherlands	2019-06-16	Jabeek	0	18	5.56667	-8	50.9694	5.94805
North	The Netherlands	2019-06-23	Jabeek	3	23	5.8	9	50.9694	5.94805
North	The Netherlands	2019-06-30	Jabeek	1	23	6.03333	8	50.9694	5.94805
North	The Netherlands	2019-07-07	Jabeek	1	14	6.26667	8	50.9694	5.94805
North	The Netherlands	2019-07-14	Jabeek	0	17	6.5	-17	50.9694	5.94805
North	The Netherlands	2019-07-21	Jabeek	0	24	6.73333	-35	50.9694	5.94805
North	The Netherlands	2019-07-28	Jabeek	1	17	6.96667	-16	50.9694	5.94805
North	The Netherlands	2019-08-04	Jabeek	1	23	7.2	-20	50.9694	5.94805
North	The Netherlands	2020-06-02	Jabeek	1	23	5.13333	-3	50.9694	5.94805
North	The Netherlands	2020-06-12	Jabeek	0	19	5.46667	-6	50.9694	5.94805
North	The Netherlands	2020-06-17	Jabeek	0	18	5.63333	-4	50.9694	5.94805
North	The Netherlands	2020-06-24	Jabeek	1	22	5.86667	0	50.9694	5.94805
North	The Netherlands	2020-07-03	Jabeek	0	16	6.16667	-4	50.9694	5.94805
North	The Netherlands	2020-07-11	Jabeek	2	17	6.43333	-4	50.9694	5.94805
North	The Netherlands	2020-07-18	Jabeek	2	17	6.66667	-2	50.9694	5.94805
North	The Netherlands	2020-08-01	Jabeek	1	21	7.13333	8	50.9694	5.94805
North	The Netherlands	2019-06-01	Kootwijk	0	16	5.06667	-24	52.2081	5.79488
North	The Netherlands	2019-06-07	Kootwijk	0	NA	5.26667	NA	52.2081	5.79488
North	The Netherlands	2019-06-14	Kootwijk	0	NA	5.5	NA	52.2081	5.79488
North	The Netherlands	2019-06-21	Kootwijk	0	NA	5.73333	NA	52.2081	5.79488
North	The Netherlands	2019-06-29	Kootwijk	3	20	6	NA	52.2081	5.79488
North	The Netherlands	2019-07-04	Kootwijk	1	16	6.16667	NA	52.2081	5.79488
North	The Netherlands	2019-07-09	Kootwijk	0	15	6.33333	NA	52.2081	5.79488
North	The Netherlands	2019-07-20	Kootwijk	0	NA	6.7	NA	52.2081	5.79488
North	The Netherlands	2020-05-27	Kootwijk	1	15	4.93333	-15	52.2081	5.79488
North	The Netherlands	2020-06-02	Kootwijk	6	22	5.13333	-18	52.2081	5.79488
North	The Netherlands	2020-06-12	Kootwijk	4	21	5.46667	-16	52.2081	5.79488
North	The Netherlands	2020-06-19	Kootwijk	5	17	5.7	-16	52.2081	5.79488
North	The Netherlands	2020-06-25	Kootwijk	4	26	5.9	-15	52.2081	5.79488
North	The Netherlands	2020-07-03	Kootwijk	0	18	6.16667	-15	52.2081	5.79488
North	The Netherlands	2020-07-11	Kootwijk	3	17	6.43333	-16	52.2081	5.79488
North	The Netherlands	2020-07-17	Kootwijk	0	15	6.63333	-16	52.2081	5.79488
North	The Netherlands	2019-06-06	Kroondomein-Cor	0	15	5.23333	-16	52.2307	5.94313
North	The Netherlands	2019-06-14	Kroondomein-Cor	1	20	5.5	-17	52.2307	5.94313
North	The Netherlands	2019-06-18	Kroondomein-Cor	0	22	5.63333	-16	52.2307	5.94313
North	The Netherlands	2019-06-27	Kroondomein-Cor	0	18	5.93333	-16	52.2307	5.94313
North	The Netherlands	2019-07-05	Kroondomein-Cor	0	20	6.2	-16	52.2307	5.94313
North	The Netherlands	2019-07-11	Kroondomein-Cor	0	21	6.4	-16	52.2307	5.94313
North	The Netherlands	2019-07-25	Kroondomein-Cor	0	32	6.86667	-16	52.2307	5.94313
North	The Netherlands	2019-07-30	Kroondomein-Cor	0	23	7.03333	-17	52.2307	5.94313
North	The Netherlands	2018-06-07	Kroondomein-Daphne&Miriam	9	NA	5.26667	NA	52.2309	5.84616
North	The Netherlands	2018-06-15	Kroondomein-Daphne&Miriam	11	NA	5.53333	NA	52.2309	5.84616
North	The Netherlands	2018-06-20	Kroondomein-Daphne&Miriam	3	NA	5.7	NA	52.2309	5.84616
North	The Netherlands	2018-06-29	Kroondomein-Daphne&Miriam	2	NA	6	NA	52.2309	5.84616
North	The Netherlands	2018-07-06	Kroondomein-Daphne&Miriam	0	NA	6.23333	NA	52.2309	5.84616
North	The Netherlands	2018-07-09	Kroondomein-Daphne&Miriam	0	NA	6.33333	NA	52.2309	5.84616
North	The Netherlands	2019-06-02	Kroondomein-Daphne&Miriam	3	26	5.1	-5	52.2309	5.84616
North	The Netherlands	2019-06-07	Kroondomein-Daphne&Miriam	1	16	5.26667	-16	52.2309	5.84616
North	The Netherlands	2019-06-14	Kroondomein-Daphne&Miriam	1	20	5.5	-15	52.2309	5.84616
North	The Netherlands	2019-06-23	Kroondomein-Daphne&Miriam	5	23	5.8	-18	52.2309	5.84616
North	The Netherlands	2019-06-29	Kroondomein-Daphne&Miriam	0	25	6	-16	52.2309	5.84616
North	The Netherlands	2019-07-05	Kroondomein-Daphne&Miriam	0	23	6.2	-13	52.2309	5.84616
North	The Netherlands	2020-06-02	Kroondomein-Daphne&Miriam	5	22	5.13333	0	52.2309	5.84616
North	The Netherlands	2020-06-12	Kroondomein-Daphne&Miriam	0	21	5.46667	-14	52.2309	5.84616
North	The Netherlands	2020-06-19	Kroondomein-Daphne&Miriam	3	18	5.7	-30	52.2309	5.84616
North	The Netherlands	2020-06-25	Kroondomein-Daphne&Miriam	4	25	5.9	-16	52.2309	5.84616
North	The Netherlands	2020-07-11	Kroondomein-Daphne&Miriam	0	17	6.43333	-27	52.2309	5.84616
North	The Netherlands	2020-07-18	Kroondomein-Daphne&Miriam	1	19	6.66667	-17	52.2309	5.84616
North	The Netherlands	2020-07-24	Kroondomein-Daphne&Miriam	1	15	6.86667	-15	52.2309	5.84616
North	The Netherlands	2017-05-30	Manderheide	0	18	5	-17	52.4541	6.84174
North	The Netherlands	2017-06-05	Manderheide	0	18	5.2	-15	52.4541	6.84174
North	The Netherlands	2017-06-10	Manderheide	5	19	5.36667	-15	52.4541	6.84174
North	The Netherlands	2017-06-14	Manderheide	1	17	5.5	-15	52.4541	6.84174
North	The Netherlands	2017-06-21	Manderheide	3	22	5.73333	-16	52.4541	6.84174
North	The Netherlands	2017-06-26	Manderheide	0	16	5.9	-16	52.4541	6.84174
North	The Netherlands	2017-07-02	Manderheide	0	16	6.1	-16	52.4541	6.84174
North	The Netherlands	2017-07-08	Manderheide	0	21	6.3	-15	52.4541	6.84174
North	The Netherlands	2018-05-22	Manderheide	0	21	4.73333	-15	52.4541	6.84174
North	The Netherlands	2018-05-30	Manderheide	1	23	5	-15	52.4541	6.84174
North	The Netherlands	2018-06-06	Manderheide	0	20	5.23333	-16	52.4541	6.84174
North	The Netherlands	2018-06-11	Manderheide	0	19	5.4	-15	52.4541	6.84174
North	The Netherlands	2018-06-19	Manderheide	2	20	5.66667	0	52.4541	6.84174
North	The Netherlands	2018-06-25	Manderheide	2	17	5.86667	0	52.4541	6.84174
North	The Netherlands	2018-06-30	Manderheide	0	19	6.03333	-1	52.4541	6.84174
North	The Netherlands	2020-05-18	Manderheide	0	15	4.63333	0	52.4541	6.84174
North	The Netherlands	2020-05-25	Manderheide	0	14	4.86667	0	52.4541	6.84174
North	The Netherlands	2020-06-01	Manderheide	7	18	5.1	0	52.4541	6.84174
North	The Netherlands	2020-06-08	Manderheide	1	16	5.33333	-1	52.4541	6.84174
North	The Netherlands	2020-06-15	Manderheide	3	20	5.56667	-1	52.4541	6.84174
North	The Netherlands	2020-06-21	Manderheide	2	19	5.76667	-1	52.4541	6.84174
North	The Netherlands	2020-06-26	Manderheide	2	25	5.93333	-1	52.4541	6.84174
North	The Netherlands	2020-07-02	Manderheide	0	17	6.13333	-2	52.4541	6.84174
North	The Netherlands	2019-05-23	Nunspeet	0	16	4.76667	-6	52.37	5.83068
North	The Netherlands	2019-06-01	Nunspeet	0	17	5.06667	-23	52.37	5.83068
North	The Netherlands	2019-06-14	Nunspeet	0	19	5.5	-20	52.37	5.83068
North	The Netherlands	2019-06-23	Nunspeet	3	21	5.8	-26	52.37	5.83068
North	The Netherlands	2019-06-25	Nunspeet	2	27	5.86667	-28	52.37	5.83068
North	The Netherlands	2019-07-09	Nunspeet	0	16	6.33333	-29	52.37	5.83068
North	The Netherlands	2020-06-17	Nunspeet	0	17	5.63333	-16	52.37	5.83068
North	The Netherlands	2020-06-26	Nunspeet	0	25	5.93333	-16	52.37	5.83068
North	The Netherlands	2020-07-03	Nunspeet	0	17	6.16667	-16	52.37	5.83068
North	The Netherlands	2020-07-08	Nunspeet	0	15	6.33333	-16	52.37	5.83068
North	The Netherlands	2020-07-13	Nunspeet	0	19	6.5	-16	52.37	5.83068
North	The Netherlands	2020-07-23	Nunspeet	0	20	6.83333	-16	52.37	5.83068
North	The Netherlands	2018-06-09	Soerel	9	16	5.33333	-12	52.3567	5.86778
North	The Netherlands	2018-06-15	Soerel	7	16	5.53333	-6	52.3567	5.86778
North	The Netherlands	2018-06-20	Soerel	2	17	5.7	-17	52.3567	5.86778
North	The Netherlands	2018-07-10	Soerel	0	14	6.36667	2	52.3567	5.86778
North	The Netherlands	2018-07-18	Soerel	0	17	6.63333	-25	52.3567	5.86778
North	The Netherlands	2018-07-26	Soerel	0	NA	6.9	NA	52.3567	5.86778
North	The Netherlands	2018-08-10	Soerel	0	NA	7.4	NA	52.3567	5.86778
North	The Netherlands	2019-06-02	Soerel	0	NA	5.1	NA	52.3567	5.86778
North	The Netherlands	2019-06-06	Soerel	3	13	5.23333	-44	52.3567	5.86778
North	The Netherlands	2019-06-18	Soerel	4	17	5.63333	-62	52.3567	5.86778
North	The Netherlands	2019-07-06	Soerel	6	13	6.23333	-45	52.3567	5.86778
North	The Netherlands	2019-07-13	Soerel	0	14	6.46667	-45	52.3567	5.86778
North	The Netherlands	2019-07-19	Soerel	0	18	6.66667	-54	52.3567	5.86778
North	The Netherlands	2020-05-26	Soerel	0	17	4.9	-72	52.3567	5.86778
North	The Netherlands	2020-06-02	Soerel	0	NA	5.13333	NA	52.3567	5.86778
North	The Netherlands	2020-06-11	Soerel	2	NA	5.43333	NA	52.3567	5.86778
North	The Netherlands	2020-06-17	Soerel	1	NA	5.63333	NA	52.3567	5.86778
North	The Netherlands	2020-06-18	Soerel	1	NA	5.66667	NA	52.3567	5.86778
North	The Netherlands	2020-06-24	Soerel	0	NA	5.86667	NA	52.3567	5.86778
North	The Netherlands	2020-07-01	Soerel	0	NA	6.1	NA	52.3567	5.86778
North	The Netherlands	2020-07-18	Soerel	0	NA	6.66667	NA	52.3567	5.86778
North	The Netherlands	2018-06-28	Tongeren18	1	18	5.96667	-22	52.3553	5.92291
North	The Netherlands	2018-06-29	Tongeren18	0	NA	6	NA	52.3553	5.92291
North	The Netherlands	2018-07-05	Tongeren18	0	NA	6.2	NA	52.3553	5.92291
North	The Netherlands	2018-07-12	Tongeren18	0	NA	6.43333	NA	52.3553	5.92291
North	The Netherlands	2019-06-05	Tongeren19	0	19	5.2	-8	52.3546	5.92904
North	The Netherlands	2019-06-14	Tongeren19	0	20	5.5	-15	52.3546	5.92904
North	The Netherlands	2019-06-18	Tongeren19	0	21	5.63333	-17	52.3546	5.92904
North	The Netherlands	2019-06-24	Tongeren19	0	26	5.83333	-33	52.3546	5.92904
North	The Netherlands	2019-07-05	Tongeren19	0	19	6.2	-31	52.3546	5.92904
North	The Netherlands	2019-07-19	Tongeren19	0	20	6.66667	-19	52.3546	5.92904
North	The Netherlands	2019-07-26	Tongeren19	0	28	6.9	-24	52.3546	5.92904
North	The Netherlands	2019-06-02	Vierhouten-Carolien	0	24	5.1	-5	52.3248	5.82785
North	The Netherlands	2019-06-09	Vierhouten-Carolien	0	18	5.33333	-12	52.3248	5.82785
North	The Netherlands	2019-06-14	Vierhouten-Carolien	1	16	5.5	-15	52.3248	5.82785
North	The Netherlands	2019-06-21	Vierhouten-Carolien	2	22	5.73333	-18	52.3248	5.82785
North	The Netherlands	2019-07-18	Vierhouten-Carolien	0	NA	6.63333	NA	52.3248	5.82785
North	The Netherlands	2019-07-21	Vierhouten-Carolien	0	NA	6.73333	NA	52.3248	5.82785
North	The Netherlands	2020-06-19	Vierhouten-Carolien	0	15	5.7	-3	52.3248	5.82785
North	The Netherlands	2020-06-21	Vierhouten-Carolien	0	18	5.76667	-3	52.3248	5.82785
North	The Netherlands	2020-06-26	Vierhouten-Carolien	0	23	5.93333	-3	52.3248	5.82785
North	The Netherlands	2020-06-30	Vierhouten-Carolien	0	9	6.06667	-18	52.3248	5.82785
North	The Netherlands	2020-07-17	Vierhouten-Carolien	0	17	6.63333	-20	52.3248	5.82785
North	The Netherlands	2020-07-31	Vierhouten-Carolien	0	25	7.1	-1	52.3248	5.82785
North	The Netherlands	2019-06-09	Vierhouten-Cindy	2	16	5.33333	-14	52.3375	5.84023
North	The Netherlands	2019-06-14	Vierhouten-Cindy	1	17	5.5	-13	52.3375	5.84023
North	The Netherlands	2019-06-18	Vierhouten-Cindy	0	22	5.63333	-15	52.3375	5.84023
North	The Netherlands	2019-06-26	Vierhouten-Cindy	0	18	5.9	-14	52.3375	5.84023
North	The Netherlands	2019-07-04	Vierhouten-Cindy	0	18	6.16667	-14	52.3375	5.84023
North	The Netherlands	2019-07-12	Vierhouten-Cindy	0	17	6.43333	-14	52.3375	5.84023
North	The Netherlands	2019-06-04	Vierhouten-Rob	0	19	5.16667	-16	52.3383	5.85299
North	The Netherlands	2019-06-09	Vierhouten-Rob	1	18	5.33333	-14	52.3383	5.85299
North	The Netherlands	2019-06-14	Vierhouten-Rob	1	17	5.5	-13	52.3383	5.85299
North	The Netherlands	2019-06-18	Vierhouten-Rob	1	22	5.63333	-13	52.3383	5.85299
North	The Netherlands	2019-06-24	Vierhouten-Rob	1	24	5.83333	-13	52.3383	5.85299
North	The Netherlands	2019-07-04	Vierhouten-Rob	2	18	6.16667	-11	52.3383	5.85299
North	The Netherlands	2019-07-12	Vierhouten-Rob	1	17	6.43333	-14	52.3383	5.85299
North	The Netherlands	2019-07-17	Vierhouten-Rob	0	21	6.6	-13	52.3383	5.85299
North	United Kingdom	2020-06-15	22 Clinton Close, Knaphill	1	25	5.56667	-21	51.3166	-0.611599
North	United Kingdom	2020-06-20	22 Clinton Close, Knaphill	1	22	5.73333	7	51.3166	-0.611599
North	United Kingdom	2020-06-28	22 Clinton Close, Knaphill	1	22	6	-23	51.3166	-0.611599
North	United Kingdom	2020-07-06	22 Clinton Close, Knaphill	0	20	6.26667	-20	51.3166	-0.611599
North	United Kingdom	2018-06-03	Coney Hill	1	20	5.13333	-15	51.372	0.00291902
North	United Kingdom	2018-06-04	Coney Hill	0	16	5.16667	-13	51.372	0.00291902
North	United Kingdom	2018-06-06	Coney Hill	1	17	5.23333	-17	51.372	0.00291902
North	United Kingdom	2018-06-08	Coney Hill	0	17	5.3	-15	51.372	0.00291902
North	United Kingdom	2018-06-20	Coney Hill	0	20	5.7	-16	51.372	0.00291902
North	United Kingdom	2018-06-22	Coney Hill	1	19	5.76667	-16	51.372	0.00291902
North	United Kingdom	2018-06-23	Coney Hill	2	21	5.8	-16	51.372	0.00291902
North	United Kingdom	2018-06-27	Coney Hill	0	17	5.93333	-17	51.372	0.00291902
North	United Kingdom	2020-06-22	Coney Hill	0	18	5.8	-21	51.372	0.00291902
North	United Kingdom	2020-06-23	Coney Hill	2	21	5.83333	-16	51.372	0.00291902
North	United Kingdom	2020-06-24	Coney Hill	0	24	5.86667	-21	51.372	0.00291902
North	United Kingdom	2020-06-25	Coney Hill	1	25	5.9	-21	51.372	0.00291902
North	United Kingdom	2020-06-26	Coney Hill	0	18	5.93333	-21	51.372	0.00291902
North	United Kingdom	2020-06-27	Coney Hill	0	17	5.96667	-21	51.372	0.00291902
North	United Kingdom	2018-06-10	Fleet Pond Mystery Gang Traipse	1	17	5.36667	-11	51.2876	-0.807302
North	United Kingdom	2017-06-01	Hayes Common	2	19	5.06667	42	53.2313	0.001052
North	United Kingdom	2020-06-01	Hilda Vale Road	13	19	5.1	-23	51.3644	0.061238
North	United Kingdom	2020-06-09	Hilda Vale Road	1	14	5.36667	0	51.3644	0.061238
North	United Kingdom	2020-06-13	Hilda Vale Road - Point	9	16	5.5	42	51.3644	0.0615158
North	United Kingdom	2020-06-14	Hilda Vale Road - Point	5	19	5.53333	-18	51.3644	0.0615158
North	United Kingdom	2020-06-15	Hilda Vale Road - Point	3	15	5.56667	-19	51.3644	0.0615158
North	United Kingdom	2018-06-25	Linwood Close Woodland	0	21	5.86667	-67	51.4687	-0.0781584
North	United Kingdom	2018-06-02	Manor Road / Fifth Cross Road	0	20	5.1	-15	51.4434	-0.354439
North	United Kingdom	2018-06-10	Manor Road / Fifth Cross Road	0	19	5.36667	-22	51.4434	-0.354439
North	United Kingdom	2017-06-12	Oaktree Road	1	13	5.43333	40	50.928	-1.37554
North	United Kingdom	2017-06-14	Oaktree Road	1	19	5.5	14	50.928	-1.37554
North	United Kingdom	2017-06-17	Oaktree Road	0	19	5.6	37	50.928	-1.37554
North	United Kingdom	2017-06-19	Oaktree Road	1	23	5.66667	-24	50.928	-1.37554
North	United Kingdom	2017-06-23	Oaktree Road	0	17	5.8	1	50.928	-1.37554
North	United Kingdom	2017-07-02	Oaktree Road	0	23	6.1	-23	50.928	-1.37554
North	United Kingdom	2017-07-09	Oaktree Road	0	25	6.33333	-20	50.928	-1.37554
North	United Kingdom	2017-07-16	Oaktree Road	0	18	6.56667	-34	50.928	-1.37554
North	United Kingdom	2017-07-23	Oaktree Road	0	16	6.8	44	50.928	-1.37554
North	United Kingdom	2018-06-02	Oaktree Road	1	22	5.1	8	50.928	-1.37554
North	United Kingdom	2020-06-01	Oaktree Road	2	20	5.1	24	50.928	-1.37554
North	United Kingdom	2018-05-26	Silverwitch Green	1	16	4.86667	-29	51.8895	0.839525
North	United Kingdom	2018-06-15	Silverwitch Green	1	19	5.53333	-18	51.8895	0.839525
North	United Kingdom	2018-06-20	Silverwitch Green	1	17	5.7	-50	51.8895	0.839525
North	United Kingdom	2018-05-20	Singleton Crescent	0	13	4.66667	-36	50.8169	-0.438692
North	United Kingdom	2018-05-20	Singleton Crescent	0	13	4.66667	-36	50.8169	-0.438692
North	United Kingdom	2018-06-04	Singleton Crescent	0	16	5.16667	-9	50.8169	-0.438692
North	United Kingdom	2018-06-06	Singleton Crescent	0	19	5.23333	-56	50.8169	-0.438692
North	United Kingdom	2018-06-12	Swaythling 01	1	19	5.43333	-10	50.9431	-1.38005
North	United Kingdom	2018-06-19	Swaythling 01	0	17	5.66667	-14	50.9431	-1.38005
North	United Kingdom	2018-06-26	Swaythling 01	0	17	5.9	-15	50.9431	-1.38005
North	United Kingdom	2018-07-03	Swaythling 01	0	17	6.13333	-13	50.9431	-1.38005
North	United Kingdom	2018-07-11	Swaythling 01	0	17	6.4	-18	50.9431	-1.38005
North	United Kingdom	2018-07-17	Swaythling 01	0	18	6.6	-13	50.9431	-1.38005
North	United Kingdom	2018-07-24	Swaythling 01	0	17	6.83333	-20	50.9431	-1.38005
North	United Kingdom	2018-06-19	The Avenue, Farnham Park	0	19	5.66667	-33	51.2218	-0.792847
North	United Kingdom	2019-06-16	Titsey Place	0	14	5.56667	-14	51.2763	0.00917316
North	United Kingdom	2019-06-23	Titsey Place	0	19	5.8	-16	51.2763	0.00917316
North	United Kingdom	2019-06-28	Titsey Place	0	19	5.96667	-16	51.2763	0.00917316
North	United Kingdom	2019-07-10	Titsey Place	0	19	6.36667	-16	51.2763	0.00917316
North	United Kingdom	2019-07-17	Titsey Place	0	18	6.6	-14	51.2763	0.00917316
North	United Kingdom	2019-07-24	Titsey Place	0	24	6.83333	-16	51.2763	0.00917316
North	United Kingdom	2019-07-31	Titsey Place	0	18	7.06667	-16	51.2763	0.00917316
North	United Kingdom	2020-06-03	Titsey Place	0	14	5.16667	-29	51.2763	0.00917316
North	United Kingdom	2020-06-14	Titsey Place	0	16	5.53333	-23	51.2763	0.00917316
North	United Kingdom	2020-06-24	Titsey Place	0	24	5.86667	-26	51.2763	0.00917316
North	United Kingdom	2020-07-02	Titsey Place	0	17	6.13333	-24	51.2763	0.00917316
North	United Kingdom	2020-07-08	Titsey Place	0	15	6.33333	-26	51.2763	0.00917316
North	United Kingdom	2020-07-17	Titsey Place	0	19	6.63333	-14	51.2763	0.00917316
North	United Kingdom	2020-07-22	Titsey Place	0	18	6.8	-18	51.2763	0.00917316
North	United Kingdom	2020-07-29	Titsey Place	0	18	7.03333	-18	51.2763	0.00917316
North	United Kingdom	2018-06-12	Twyford	0	21	5.43333	-16	51.4831	-0.86484
North	United Kingdom	2018-06-19	Twyford	1	19	5.66667	-14	51.4831	-0.86484
North	United Kingdom	2018-06-25	Twyford	1	23	5.86667	-15	51.4831	-0.86484
North	United Kingdom	2018-07-05	Twyford	0	23	6.2	-15	51.4831	-0.86484
North	United Kingdom	2019-05-21	Twyford	1	17	4.7	-15	51.4831	-0.86484
North	United Kingdom	2019-05-31	Twyford	0	15	5.03333	-15	51.4831	-0.86484
North	United Kingdom	2019-06-04	Twyford	1	14	5.16667	-15	51.4831	-0.86484
North	United Kingdom	2019-06-17	Twyford	1	15	5.6	-16	51.4831	-0.86484
North	United Kingdom	2019-06-20	Twyford	0	19	5.7	-15	51.4831	-0.86484
North	United Kingdom	2019-06-22	Twyford	2	17	5.76667	-16	51.4831	-0.86484
North	United Kingdom	2019-06-25	Twyford	0	24	5.86667	-15	51.4831	-0.86484
North	United Kingdom	2019-07-02	Twyford	0	15	6.1	-26	51.4831	-0.86484
Southeast	Croatia	2019-07-11	Korana	1	19	6.4	-15	44.9312	15.6235
Southeast	Croatia	2019-07-18	Korana	1	19	6.63333	-15	44.9312	15.6235
Southeast	Croatia	2019-07-19	Korana	0	18	6.66667	-15	44.9312	15.6235
Southeast	Croatia	2019-07-24	Korana	1	18	6.83333	-15	44.9312	15.6235
Southeast	Croatia	2019-08-01	Korana	0	17	7.1	-15	44.9312	15.6235
Southeast	Croatia	2019-08-08	Korana	0	17	7.33333	-15	44.9312	15.6235
Southeast	Croatia	2019-06-13	Mlada vodica-Puavice	9	22	5.46667	NA	45.2173	17.8996
Southeast	Croatia	2019-06-14	Mlada vodica-Puavice	1	23	5.5	NA	45.2173	17.8996
Southeast	Croatia	2019-06-15	Mlada vodica-Puavice	3	23	5.53333	NA	45.2173	17.8996
Southeast	Croatia	2019-06-16	Mlada vodica-Puavice	3	24	5.56667	NA	45.2173	17.8996
Southeast	Croatia	2019-06-17	Mlada vodica-Puavice	1	20	5.6	NA	45.2173	17.8996
Southeast	Croatia	2019-06-18	Mlada vodica-Puavice	5	26	5.63333	NA	45.2173	17.8996
Southeast	Croatia	2019-06-20	Mlada vodica-Puavice	3	22	5.7	NA	45.2173	17.8996
Southeast	Croatia	2019-06-21	Mlada vodica-Puavice	3	21	5.73333	NA	45.2173	17.8996
Southeast	Croatia	2019-06-22	Mlada vodica-Puavice	3	23	5.76667	NA	45.2173	17.8996
Southeast	Croatia	2019-06-23	Mlada vodica-Puavice	3	23	5.8	NA	45.2173	17.8996
Southeast	Croatia	2020-06-25	Mlada vodica-Puavice	6	24	5.9	NA	45.2173	17.8996
Southeast	Croatia	2020-06-26	Mlada vodica-Puavice	10	25	5.93333	NA	45.2173	17.8996
Southeast	Croatia	2020-06-27	Mlada vodica-Puavice	7	28	5.96667	NA	45.2173	17.8996
Southeast	Croatia	2020-06-28	Mlada vodica-Puavice	6	30	6	NA	45.2173	17.8996
Southeast	Croatia	2020-06-29	Mlada vodica-Puavice	9	23	6.03333	NA	45.2173	17.8996
Southeast	Croatia	2020-06-30	Mlada vodica-Puavice	2	25	6.06667	NA	45.2173	17.8996
Southeast	Croatia	2020-07-01	Mlada vodica-Puavice	5	28	6.1	NA	45.2173	17.8996
Southeast	Croatia	2020-07-02	Mlada vodica-Puavice	7	27	6.13333	NA	45.2173	17.8996
Southeast	Croatia	2020-07-03	Mlada vodica-Puavice	6	23	6.16667	NA	45.2173	17.8996
Southeast	Croatia	2020-07-04	Mlada vodica-Puavice	3	26	6.2	NA	45.2173	17.8996
Southeast	Croatia	2019-06-21	Poljane	2	25	5.73333	-22	46.1814	15.9316
Southeast	Croatia	2019-06-24	Poljane	6	24	5.83333	-23	46.1814	15.9316
Southeast	Croatia	2019-06-25	Poljane	41	26	5.86667	-23	46.1814	15.9316
Southeast	Croatia	2019-06-26	Poljane	16	26	5.9	-23	46.1814	15.9316
Southeast	Croatia	2019-06-27	Poljane	9	25	5.93333	-23	46.1814	15.9316
Southeast	Croatia	2019-06-28	Poljane	11	23	5.96667	-23	46.1814	15.9316
Southeast	Croatia	2019-07-01	Poljane	8	26	6.06667	-22	46.1814	15.9316
Southeast	Croatia	2019-07-04	Poljane	4	22	6.16667	-22	46.1814	15.9316
Southeast	Croatia	2019-07-05	Poljane	10	21	6.2	-21	46.1814	15.9316
Southeast	Croatia	2019-07-09	Poljane	2	17	6.33333	-20	46.1814	15.9316
Southeast	Croatia	2019-07-10	Poljane	17	18	6.36667	-19	46.1814	15.9316
Southeast	Croatia	2019-07-11	Poljane	15	18	6.4	-18	46.1814	15.9316
Southeast	Croatia	2019-07-15	Poljane	16	18	6.53333	-16	46.1814	15.9316
Southeast	Croatia	2019-07-16	Poljane	10	21	6.56667	-15	46.1814	15.9316
Southeast	Croatia	2019-07-17	Poljane	19	23	6.6	-14	46.1814	15.9316
Southeast	Croatia	2019-07-19	Poljane	16	24	6.66667	-13	46.1814	15.9316
Southeast	Croatia	2019-07-22	Poljane	12	24	6.76667	-10	46.1814	15.9316
Southeast	Croatia	2019-07-23	Poljane	14	26	6.8	-9	46.1814	15.9316
Southeast	Croatia	2019-07-27	Poljane	3	22	6.93333	-5	46.1814	15.9316
Southeast	Croatia	2019-07-28	Poljane	2	22	6.96667	-3	46.1814	15.9316
Southeast	Croatia	2019-07-29	Poljane	6	22	7	-2	46.1814	15.9316
Southeast	Croatia	2019-07-30	Poljane	8	24	7.03333	-1	46.1814	15.9316
Southeast	Italy	2019-06-05	Bosco Fontana A	1	NA	5.2	-15	45.1954	10.7475
Southeast	Italy	2019-06-12	Bosco Fontana A	2	NA	5.43333	-15	45.1954	10.7475
Southeast	Italy	2019-06-19	Bosco Fontana A	5	NA	5.66667	-15	45.1954	10.7475
Southeast	Italy	2019-06-26	Bosco Fontana A	22	NA	5.9	-15	45.1954	10.7475
Southeast	Italy	2019-07-03	Bosco Fontana A	0	NA	6.13333	-15	45.1954	10.7475
Southeast	Italy	2019-07-10	Bosco Fontana A	36	NA	6.36667	-15	45.1954	10.7475
Southeast	Italy	2019-07-17	Bosco Fontana A	13	NA	6.6	-15	45.1954	10.7475
Southeast	Italy	2019-07-24	Bosco Fontana A	5	NA	6.83333	-15	45.1954	10.7475
Southeast	Italy	2019-07-31	Bosco Fontana A	1	NA	7.06667	-15	45.1954	10.7475
Southeast	Italy	2019-06-05	Bosco Fontana B	2	NA	5.2	-15	45.2057	10.7423
Southeast	Italy	2019-06-12	Bosco Fontana B	1	NA	5.43333	-15	45.2057	10.7423
Southeast	Italy	2019-06-19	Bosco Fontana B	4	NA	5.66667	-15	45.2057	10.7423
Southeast	Italy	2019-06-26	Bosco Fontana B	6	NA	5.9	-15	45.2057	10.7423
Southeast	Italy	2019-07-03	Bosco Fontana B	0	NA	6.13333	-15	45.2057	10.7423
Southeast	Italy	2019-07-10	Bosco Fontana B	16	NA	6.36667	-15	45.2057	10.7423
Southeast	Italy	2019-07-17	Bosco Fontana B	7	NA	6.6	-15	45.2057	10.7423
Southeast	Italy	2019-07-24	Bosco Fontana B	3	NA	6.83333	-15	45.2057	10.7423
Southeast	Italy	2019-07-31	Bosco Fontana B	0	NA	7.06667	-15	45.2057	10.7423
Southeast	Italy	2018-06-26	Bosco della Capannella	32	NA	5.9	-15	44.7333	10.2071
Southeast	Italy	2018-07-03	Bosco della Capannella	16	NA	6.13333	-15	44.7333	10.2071
Southeast	Italy	2018-07-10	Bosco della Capannella	26	NA	6.36667	-15	44.7333	10.2071
Southeast	Italy	2018-07-17	Bosco della Capannella	21	NA	6.6	-15	44.7333	10.2071
Southeast	Italy	2018-07-24	Bosco della Capannella	3	NA	6.83333	-15	44.7333	10.2071
Southeast	Italy	2018-07-31	Bosco della Capannella	2	NA	7.06667	-15	44.7333	10.2071
Southeast	Italy	2019-06-25	Bosco della Capannella	1	NA	5.86667	-15	44.7333	10.2071
Southeast	Italy	2019-07-02	Bosco della Capannella	12	NA	6.1	-15	44.7333	10.2071
Southeast	Italy	2019-07-11	Bosco della Capannella	31	NA	6.4	-15	44.7333	10.2071
Southeast	Italy	2019-07-16	Bosco della Capannella	40	NA	6.56667	-15	44.7333	10.2071
Southeast	Italy	2019-07-23	Bosco della Capannella	18	NA	6.8	-15	44.7333	10.2071
Southeast	Italy	2019-07-30	Bosco della Capannella	20	NA	7.03333	-15	44.7333	10.2071
Southeast	Italy	2019-08-06	Bosco della Capannella	2	NA	7.26667	-15	44.7333	10.2071
Southeast	Italy	2020-06-30	Bosco della Capannella	6	NA	6.06667	-15	44.7333	10.2071
Southeast	Italy	2020-07-07	Bosco della Capannella	14	NA	6.3	-15	44.7333	10.2071
Southeast	Italy	2020-07-14	Bosco della Capannella	25	NA	6.53333	-15	44.7333	10.2071
Southeast	Italy	2020-07-21	Bosco della Capannella	16	NA	6.76667	-15	44.7333	10.2071
Southeast	Italy	2020-07-28	Bosco della Capannella	25	NA	7	-15	44.7333	10.2071
Southeast	Italy	2020-08-04	Bosco della Capannella	1	NA	7.23333	-15	44.7333	10.2071
Southeast	Italy	2019-06-25	Conecofor	0	NA	5.86667	-15	44.7171	10.201
Southeast	Italy	2019-07-02	Conecofor	1	NA	6.1	-15	44.7171	10.201
Southeast	Italy	2019-07-11	Conecofor	8	NA	6.4	-15	44.7171	10.201
Southeast	Italy	2019-07-16	Conecofor	9	NA	6.56667	-15	44.7171	10.201
Southeast	Italy	2019-07-23	Conecofor	41	NA	6.8	-15	44.7171	10.201
Southeast	Italy	2019-07-30	Conecofor	14	NA	7.03333	-15	44.7171	10.201
Southeast	Italy	2019-08-06	Conecofor	6	NA	7.26667	-15	44.7171	10.201
Southeast	Italy	2020-06-30	Conecofor	2	NA	6.06667	-15	44.7171	10.201
Southeast	Italy	2020-07-07	Conecofor	13	NA	6.3	-15	44.7171	10.201
Southeast	Italy	2020-07-14	Conecofor	9	NA	6.53333	-15	44.7171	10.201
Southeast	Italy	2020-07-21	Conecofor	23	NA	6.76667	-15	44.7171	10.201
Southeast	Italy	2020-07-28	Conecofor	7	NA	7	-15	44.7171	10.201
Southeast	Italy	2020-08-04	Conecofor	0	NA	7.23333	-15	44.7171	10.201
Southeast	Italy	2018-06-26	Monte Castione	10	NA	5.9	-15	44.7067	10.1956
Southeast	Italy	2018-07-03	Monte Castione	5	NA	6.13333	-15	44.7067	10.1956
Southeast	Italy	2018-07-10	Monte Castione	14	NA	6.36667	-15	44.7067	10.1956
Southeast	Italy	2018-07-17	Monte Castione	15	NA	6.6	-15	44.7067	10.1956
Southeast	Italy	2018-07-24	Monte Castione	7	NA	6.83333	-15	44.7067	10.1956
Southeast	Italy	2018-07-31	Monte Castione	2	NA	7.06667	-15	44.7067	10.1956
Southeast	Italy	2019-06-25	Monte Castione	0	NA	5.86667	-15	44.7067	10.1956
Southeast	Italy	2019-07-02	Monte Castione	0	NA	6.1	-15	44.7067	10.1956
Southeast	Italy	2019-07-11	Monte Castione	0	NA	6.4	-15	44.7067	10.1956
Southeast	Italy	2019-07-16	Monte Castione	2	NA	6.56667	-15	44.7067	10.1956
Southeast	Italy	2019-07-23	Monte Castione	23	NA	6.8	-15	44.7067	10.1956
Southeast	Italy	2019-07-30	Monte Castione	13	NA	7.03333	-15	44.7067	10.1956
Southeast	Italy	2019-08-06	Monte Castione	3	NA	7.26667	-15	44.7067	10.1956
Southeast	Italy	2020-06-30	Monte Castione	2	NA	6.06667	-15	44.7067	10.1956
Southeast	Italy	2020-07-07	Monte Castione	2	NA	6.3	-15	44.7067	10.1956
Southeast	Italy	2020-07-14	Monte Castione	7	NA	6.53333	-15	44.7067	10.1956
Southeast	Italy	2020-07-21	Monte Castione	9	NA	6.76667	-15	44.7067	10.1956
Southeast	Italy	2020-07-28	Monte Castione	2	NA	7	-15	44.7067	10.1956
Southeast	Italy	2020-08-04	Monte Castione	0	NA	7.23333	-15	44.7067	10.1956
Southeast	Italy	2018-06-26	Piana Marchesi	1	NA	5.9	-15	44.7284	10.2014
Southeast	Italy	2018-07-03	Piana Marchesi	5	NA	6.13333	-15	44.7284	10.2014
Southeast	Italy	2018-07-10	Piana Marchesi	7	NA	6.36667	-15	44.7284	10.2014
Southeast	Italy	2018-07-17	Piana Marchesi	8	NA	6.6	-15	44.7284	10.2014
Southeast	Italy	2018-07-24	Piana Marchesi	15	NA	6.83333	-15	44.7284	10.2014
Southeast	Italy	2018-07-31	Piana Marchesi	1	NA	7.06667	-15	44.7284	10.2014
Southeast	Italy	2019-06-25	Piana Marchesi	0	NA	5.86667	-15	44.7284	10.2014
Southeast	Italy	2019-07-02	Piana Marchesi	1	NA	6.1	-15	44.7284	10.2014
Southeast	Italy	2019-07-11	Piana Marchesi	6	NA	6.4	-15	44.7284	10.2014
Southeast	Italy	2019-07-16	Piana Marchesi	6	NA	6.56667	-15	44.7284	10.2014
Southeast	Italy	2019-07-23	Piana Marchesi	11	NA	6.8	-15	44.7284	10.2014
Southeast	Italy	2019-07-30	Piana Marchesi	8	NA	7.03333	-15	44.7284	10.2014
Southeast	Italy	2019-08-06	Piana Marchesi	1	NA	7.26667	-15	44.7284	10.2014
Southeast	Italy	2020-06-30	Piana Marchesi	0	NA	6.06667	-15	44.7284	10.2014
Southeast	Italy	2020-07-07	Piana Marchesi	4	NA	6.3	-15	44.7284	10.2014
Southeast	Italy	2020-07-14	Piana Marchesi	2	NA	6.53333	-15	44.7284	10.2014
Southeast	Italy	2020-07-21	Piana Marchesi	16	NA	6.76667	-15	44.7284	10.2014
Southeast	Italy	2020-07-28	Piana Marchesi	3	NA	7	-15	44.7284	10.2014
Southeast	Italy	2020-08-04	Piana Marchesi	0	NA	7.23333	-15	44.7284	10.2014
Southeast	Italy	2018-06-26	Ponte Verde	0	NA	5.9	-15	44.7238	10.2088
Southeast	Italy	2018-07-03	Ponte Verde	3	NA	6.13333	-15	44.7238	10.2088
Southeast	Italy	2018-07-17	Ponte Verde	9	NA	6.6	-15	44.7238	10.2088
Southeast	Italy	2018-07-24	Ponte Verde	8	NA	6.83333	-15	44.7238	10.2088
Southeast	Italy	2018-07-31	Ponte Verde	0	NA	7.06667	-15	44.7238	10.2088
Southeast	Italy	2020-06-15	Sentiero Mapello	2	19.6	5.56667	-29	45.7092	9.53435
Southeast	Italy	2020-06-16	Sentiero Mapello	2	21.4	5.6	-29	45.7092	9.53435
Southeast	Italy	2020-06-17	Sentiero Mapello	0	19	5.63333	-25	45.7092	9.53435
Southeast	Italy	2020-06-22	Sentiero Mapello	5	25	5.8	-16	45.7092	9.53435
Southeast	Italy	2020-06-23	Sentiero Mapello	10	25.4	5.83333	-16	45.7092	9.53435
Southeast	Italy	2020-06-28	Sentiero Mapello	8	26.6	6	-16	45.7092	9.53435
Southeast	Italy	2020-07-05	Sentiero Mapello	2	26.2	6.23333	-10	45.7092	9.53435
Southeast	Slovenia	2007-07-15	Črnotiče	1	26	6.53333	-22	45.5512	13.8996
Southeast	Slovenia	2007-07-26	Črnotiče	0	22	6.9	-22	45.5512	13.8996
Southeast	Slovenia	2007-07-28	Črnotiče	0	NA	6.96667	-9	45.5512	13.8996
Southeast	Slovenia	2008-06-23	Črnotiče	4	31	5.83333	-8	45.5512	13.8996
Southeast	Slovenia	2008-06-30	Črnotiče	11	30	6.06667	-28	45.5512	13.8996
Southeast	Slovenia	2008-07-11	Črnotiče	4	24	6.43333	-24	45.5512	13.8996
Southeast	Slovenia	2009-06-26	Črnotiče	2	19	5.9	-28	45.5512	13.8996
Southeast	Slovenia	2009-07-05	Črnotiče	9	22	6.2	-37	45.5512	13.8996
Southeast	Slovenia	2009-07-12	Črnotiče	7	23	6.43333	-18	45.5512	13.8996
Southeast	Slovenia	2010-06-27	Črnotiče	7	28	5.93333	-38	45.5512	13.8996
Southeast	Slovenia	2010-07-08	Črnotiče	6	NA	6.3	-26	45.5512	13.8996
Southeast	Slovenia	2011-06-20	Črnotiče	0	21	5.7	-22	45.5512	13.8996
Southeast	Slovenia	2011-07-08	Črnotiče	13	24	6.3	-26	45.5512	13.8996
Southeast	Slovenia	2012-06-22	Črnotiče	1	18.5	5.8	0	45.5512	13.8996
Southeast	Slovenia	2013-06-06	Črnotiče	0	17	5.23333	-15	45.5512	13.8996
Southeast	Slovenia	2013-06-17	Črnotiče	0	22	5.6	-15	45.5512	13.8996
Southeast	Slovenia	2013-07-04	Črnotiče	4	22	6.16667	-15	45.5512	13.8996
Southeast	Slovenia	2015-07-01	Črnotiče	0	NA	6.06667	-16	45.5512	13.8996
Southeast	Slovenia	2017-06-02	Črnotiče	1	22	5.1	-14	45.5512	13.8996
Southeast	Slovenia	2017-06-19	Črnotiče	0	24	5.66667	-15	45.5512	13.8996
Southeast	Slovenia	2017-07-08	Črnotiče	2	26	6.3	-15	45.5512	13.8996
Southeast	Slovenia	2019-06-26	Črnotiče	0	30	5.9	-15	45.5512	13.8996
Southeast	Slovenia	2007-07-07	Hrastnik	1	NA	6.26667	-19	46.1237	15.0974
Southeast	Slovenia	2007-07-16	Hrastnik	1	NA	6.56667	-23	46.1237	15.0974
Southeast	Slovenia	2007-07-23	Hrastnik	0	NA	6.8	-12	46.1237	15.0974
Southeast	Slovenia	2008-06-19	Hrastnik	12	NA	5.7	-42	46.1237	15.0974
Southeast	Slovenia	2008-06-21	Hrastnik	6	NA	5.76667	-20	46.1237	15.0974
Southeast	Slovenia	2008-06-23	Hrastnik	10	NA	5.83333	-26	46.1237	15.0974
Southeast	Slovenia	2008-07-11	Hrastnik	10	NA	6.43333	-22	46.1237	15.0974
Southeast	Slovenia	2009-06-06	Hrastnik	5	NA	5.23333	-33	46.1237	15.0974
Southeast	Slovenia	2009-06-13	Hrastnik	8	NA	5.46667	-42	46.1237	15.0974
Southeast	Slovenia	2009-06-28	Hrastnik	1	NA	5.96667	-24	46.1237	15.0974
Southeast	Slovenia	2010-06-02	Hrastnik	2	18	5.1	-10	46.1237	15.0974
Southeast	Slovenia	2010-06-25	Hrastnik	6	20	5.86667	-11	46.1237	15.0974
Southeast	Slovenia	2010-07-08	Hrastnik	16	19	6.3	-17	46.1237	15.0974
Southeast	Slovenia	2011-06-14	Hrastnik	0	21	5.5	-18	46.1237	15.0974
Southeast	Slovenia	2011-06-23	Hrastnik	32	26	5.8	-27	46.1237	15.0974
Southeast	Slovenia	2011-06-30	Hrastnik	7	27	6.03333	-31	46.1237	15.0974
Southeast	Slovenia	2012-06-06	Hrastnik	1	21	5.26667	-15	46.1237	15.0974
Southeast	Slovenia	2012-06-21	Hrastnik	13	24	5.76667	2	46.1237	15.0974
Southeast	Slovenia	2012-07-04	Hrastnik	4	27	6.2	-14	46.1237	15.0974
Southeast	Slovenia	2014-06-06	Hrastnik	2	20	5.23333	-15	46.1237	15.0974
Southeast	Slovenia	2014-06-19	Hrastnik	6	19	5.66667	-14	46.1237	15.0974
Southeast	Slovenia	2014-06-27	Hrastnik	12	25	5.93333	-14	46.1237	15.0974
Southeast	Slovenia	2015-06-02	Hrastnik	1	NA	5.1	0	46.1237	15.0974
Southeast	Slovenia	2015-07-05	Hrastnik	4	23	6.2	-4	46.1237	15.0974
Southeast	Slovenia	2017-06-07	Hrastnik	0	20	5.26667	-16	46.1237	15.0974
Southeast	Slovenia	2017-06-15	Hrastnik	8	21	5.53333	-16	46.1237	15.0974
Southeast	Slovenia	2017-06-23	Hrastnik	1	22	5.8	-16	46.1237	15.0974
Southeast	Slovenia	2017-06-29	Hrastnik	1	25	6	-17	46.1237	15.0974
Southeast	Slovenia	2017-07-07	Hrastnik	2	26	6.26667	-16	46.1237	15.0974
Southeast	Slovenia	2017-07-12	Hrastnik	1	24	6.43333	-16	46.1237	15.0974
Southeast	Slovenia	2018-06-05	Hrastnik	0	19	5.2	-17	46.1237	15.0974
Southeast	Slovenia	2018-06-16	Hrastnik	2	23	5.56667	-16	46.1237	15.0974
Southeast	Slovenia	2018-06-23	Hrastnik	2	24	5.8	-15	46.1237	15.0974
Southeast	Slovenia	2018-06-29	Hrastnik	0	22	6	-14	46.1237	15.0974
Southeast	Slovenia	2018-07-07	Hrastnik	0	25	6.26667	-13	46.1237	15.0974
Southeast	Slovenia	2018-07-13	Hrastnik	0	26	6.46667	-14	46.1237	15.0974
Southeast	Slovenia	2019-06-15	Hrastnik	0	24	5.53333	-13	46.1237	15.0974
Southeast	Slovenia	2019-06-22	Hrastnik	0	22	5.76667	-15	46.1237	15.0974
Southeast	Slovenia	2019-06-29	Hrastnik	0	27	6	-15	46.1237	15.0974
Southeast	Slovenia	2019-07-06	Hrastnik	3	26	6.23333	-14	46.1237	15.0974
Southeast	Slovenia	2019-07-13	Hrastnik	0	27	6.46667	-14	46.1237	15.0974
Southeast	Slovenia	2020-06-07	Hrastnik	0	18	5.3	-16	46.1237	15.0974
Southeast	Slovenia	2020-06-14	Hrastnik	0	22	5.53333	-16	46.1237	15.0974
Southeast	Slovenia	2020-06-20	Hrastnik	1	26	5.73333	-16	46.1237	15.0974
Southeast	Slovenia	2020-06-28	Hrastnik	9	29	6	-16	46.1237	15.0974
Southeast	Slovenia	2020-07-07	Hrastnik	4	29	6.3	-16	46.1237	15.0974
Southeast	Slovenia	2007-07-09	Jelenca	1	NA	6.33333	-26	45.7594	13.9885
Southeast	Slovenia	2007-07-12	Jelenca	0	15	6.43333	-24	45.7594	13.9885
Southeast	Slovenia	2007-07-14	Jelenca	1	20	6.5	-23	45.7594	13.9885
Southeast	Slovenia	2008-06-09	Jelenca	0	NA	5.36667	-53	45.7594	13.9885
Southeast	Slovenia	2008-06-21	Jelenca	1	23	5.76667	-43	45.7594	13.9885
Southeast	Slovenia	2008-07-11	Jelenca	1	NA	6.43333	-70	45.7594	13.9885
Southeast	Slovenia	2009-06-18	Jelenca	2	21	5.63333	23	45.7594	13.9885
Southeast	Slovenia	2009-07-11	Jelenca	1	17	6.4	-49	45.7594	13.9885
Southeast	Slovenia	2009-08-02	Jelenca	0	24	7.13333	-18	45.7594	13.9885
Southeast	Slovenia	2010-06-25	Jelenca	2	19	5.86667	-19	45.7594	13.9885
Southeast	Slovenia	2011-06-21	Jelenca	4	NA	5.73333	-28	45.7594	13.9885
Southeast	Slovenia	2012-06-20	Jelenca	4	18	5.73333	0	45.7594	13.9885
Southeast	Slovenia	2014-06-04	Jelenca	0	16	5.16667	-14	45.7594	13.9885
Southeast	Slovenia	2014-06-22	Jelenca	0	23	5.76667	-15	45.7594	13.9885
Southeast	Slovenia	2014-06-29	Jelenca	4	20	6	-16	45.7594	13.9885
Southeast	Slovenia	2015-07-02	Jelenca	5	24	6.1	-16	45.7594	13.9885
Southeast	Slovenia	2017-06-03	Jelenca	0	21	5.13333	-16	45.7594	13.9885
Southeast	Slovenia	2017-06-22	Jelenca	4	24	5.76667	-16	45.7594	13.9885
Southeast	Slovenia	2017-07-06	Jelenca	3	23	6.23333	-15	45.7594	13.9885
Southeast	Slovenia	2019-06-28	Jelenca	4	25	5.96667	-16	45.7594	13.9885
Southeast	Slovenia	2007-07-15	Komarnik	3	28	6.53333	-18	46.5672	15.8147
Southeast	Slovenia	2007-07-16	Komarnik	3	26	6.56667	-17	46.5672	15.8147
Southeast	Slovenia	2007-07-22	Komarnik	2	21	6.76667	-42	46.5672	15.8147
Southeast	Slovenia	2008-06-24	Komarnik	0	28	5.86667	-55	46.5672	15.8147
Southeast	Slovenia	2008-07-01	Komarnik	1	23	6.1	-69	46.5672	15.8147
Southeast	Slovenia	2009-06-02	Komarnik	0	23	5.1	-24	46.5672	15.8147
Southeast	Slovenia	2009-06-16	Komarnik	0	25	5.56667	-23	46.5672	15.8147
Southeast	Slovenia	2011-06-21	Komarnik	0	24	5.73333	-24	46.5672	15.8147
Southeast	Slovenia	2011-07-07	Komarnik	1	27	6.26667	-23	46.5672	15.8147
Southeast	Slovenia	2012-06-19	Komarnik	0	28	5.7	-4	46.5672	15.8147
Southeast	Slovenia	2013-06-07	Komarnik	0	18	5.26667	-12	46.5672	15.8147
Southeast	Slovenia	2013-06-18	Komarnik	0	25	5.63333	1	46.5672	15.8147
Southeast	Slovenia	2013-07-10	Komarnik	4	24	6.36667	4	46.5672	15.8147
Southeast	Slovenia	2016-06-23	Komarnik	0	32	5.83333	-15	46.5672	15.8147
Southeast	Slovenia	2007-07-17	Kostel	2	NA	6.6	-21	45.5068	14.903
Southeast	Slovenia	2007-07-25	Kostel	0	NA	6.86667	-4	45.5068	14.903
Southeast	Slovenia	2008-05-29	Kostel	0	25	5	7	45.5068	14.903
Southeast	Slovenia	2008-06-22	Kostel	2	NA	5.8	-19	45.5068	14.903
Southeast	Slovenia	2008-07-10	Kostel	1	NA	6.4	-13	45.5068	14.903
Southeast	Slovenia	2009-06-19	Kostel	2	21	5.66667	-24	45.5068	14.903
Southeast	Slovenia	2009-07-11	Kostel	0	18	6.4	-23	45.5068	14.903
Southeast	Slovenia	2010-06-24	Kostel	2	20	5.83333	-19	45.5068	14.903
Southeast	Slovenia	2011-06-23	Kostel	6	23	5.8	-3	45.5068	14.903
Southeast	Slovenia	2012-06-28	Kostel	4	22	6	0	45.5068	14.903
Southeast	Slovenia	2013-06-05	Kostel	0	16	5.2	-17	45.5068	14.903
Southeast	Slovenia	2013-06-19	Kostel	0	24	5.66667	-15	45.5068	14.903
Southeast	Slovenia	2013-07-04	Kostel	9	20	6.16667	-15	45.5068	14.903
Southeast	Slovenia	2016-06-08	Kostel	0	17	5.33333	-42	45.5068	14.903
Southeast	Slovenia	2016-06-28	Kostel	2	21	6	-14	45.5068	14.903
Southeast	Slovenia	2020-07-15	Kostel	0	22	6.56667	-25	45.5068	14.903
Southeast	Slovenia	2007-07-06	Ljubljana ZOO	1	NA	6.23333	-31	46.0542	14.4696
Southeast	Slovenia	2007-07-17	Ljubljana ZOO	0	NA	6.6	-15	46.0542	14.4696
Southeast	Slovenia	2007-07-26	Ljubljana ZOO	1	NA	6.9	-11	46.0542	14.4696
Southeast	Slovenia	2008-06-05	Ljubljana ZOO	1	NA	5.23333	-55	46.0542	14.4696
Southeast	Slovenia	2008-06-12	Ljubljana ZOO	0	NA	5.46667	-38	46.0542	14.4696
Southeast	Slovenia	2008-06-18	Ljubljana ZOO	3	NA	5.66667	-15	46.0542	14.4696
Southeast	Slovenia	2009-06-09	Ljubljana ZOO	4	NA	5.33333	13	46.0542	14.4696
Southeast	Slovenia	2009-07-08	Ljubljana ZOO	0	NA	6.3	0	46.0542	14.4696
Southeast	Slovenia	2009-07-11	Ljubljana ZOO	1	NA	6.4	10	46.0542	14.4696
Southeast	Slovenia	2010-06-23	Ljubljana ZOO	3	17.5	5.8	3	46.0542	14.4696
Southeast	Slovenia	2010-07-06	Ljubljana ZOO	0	23	6.23333	-26	46.0542	14.4696
Southeast	Slovenia	2010-07-14	Ljubljana ZOO	2	24	6.5	-34	46.0542	14.4696
Southeast	Slovenia	2010-07-18	Ljubljana ZOO	1	23	6.63333	-21	46.0542	14.4696
Southeast	Slovenia	2011-06-02	Ljubljana ZOO	0	17	5.1	-27	46.0542	14.4696
Southeast	Slovenia	2011-06-20	Ljubljana ZOO	2	18	5.7	3	46.0542	14.4696
Southeast	Slovenia	2011-07-08	Ljubljana ZOO	4	24	6.3	-10	46.0542	14.4696
Southeast	Slovenia	2012-05-24	Ljubljana ZOO	0	16	4.83333	-35	46.0542	14.4696
Southeast	Slovenia	2012-05-28	Ljubljana ZOO	0	16	4.96667	-33	46.0542	14.4696
Southeast	Slovenia	2012-06-05	Ljubljana ZOO	0	14	5.23333	-18	46.0542	14.4696
Southeast	Slovenia	2012-06-14	Ljubljana ZOO	0	15	5.53333	-16	46.0542	14.4696
Southeast	Slovenia	2012-06-18	Ljubljana ZOO	1	22	5.66667	-16	46.0542	14.4696
Southeast	Slovenia	2012-06-26	Ljubljana ZOO	4	19	5.93333	-16	46.0542	14.4696
Southeast	Slovenia	2012-07-02	Ljubljana ZOO	2	23	6.13333	-16	46.0542	14.4696
Southeast	Slovenia	2012-07-09	Ljubljana ZOO	0	20	6.36667	-17	46.0542	14.4696
Southeast	Slovenia	2012-07-16	Ljubljana ZOO	2	16	6.6	-17	46.0542	14.4696
Southeast	Slovenia	2012-07-23	Ljubljana ZOO	0	18	6.83333	-16	46.0542	14.4696
Southeast	Slovenia	2012-07-30	Ljubljana ZOO	0	20	7.06667	-16	46.0542	14.4696
Southeast	Slovenia	2012-08-06	Ljubljana ZOO	0	24	7.3	-17	46.0542	14.4696
Southeast	Slovenia	2012-08-13	Ljubljana ZOO	0	23	7.53333	-16	46.0542	14.4696
Southeast	Slovenia	2012-08-20	Ljubljana ZOO	0	27	7.76667	-18	46.0542	14.4696
Southeast	Slovenia	2013-06-06	Ljubljana ZOO	0	17	5.23333	-15	46.0542	14.4696
Southeast	Slovenia	2013-06-20	Ljubljana ZOO	0	24	5.7	-16	46.0542	14.4696
Southeast	Slovenia	2013-07-06	Ljubljana ZOO	3	23	6.23333	-18	46.0542	14.4696
Southeast	Slovenia	2014-06-06	Ljubljana ZOO	0	NA	5.23333	-13	46.0542	14.4696
Southeast	Slovenia	2014-06-22	Ljubljana ZOO	0	NA	5.76667	-8	46.0542	14.4696
Southeast	Slovenia	2014-07-03	Ljubljana ZOO	0	20	6.13333	-17	46.0542	14.4696
Southeast	Slovenia	2015-07-01	Ljubljana ZOO	0	23	6.06667	-3	46.0542	14.4696
Southeast	Slovenia	2016-06-03	Ljubljana ZOO	0	18	5.16667	-16	46.0542	14.4696
Southeast	Slovenia	2016-06-07	Ljubljana ZOO	0	16	5.3	-16	46.0542	14.4696
Southeast	Slovenia	2016-06-15	Ljubljana ZOO	0	21	5.56667	-16	46.0542	14.4696
Southeast	Slovenia	2016-06-23	Ljubljana ZOO	0	27	5.83333	-16	46.0542	14.4696
Southeast	Slovenia	2016-06-29	Ljubljana ZOO	0	23	6.03333	-16	46.0542	14.4696
Southeast	Slovenia	2016-07-07	Ljubljana ZOO	0	24	6.3	-17	46.0542	14.4696
Southeast	Slovenia	2016-07-11	Ljubljana ZOO	1	29	6.43333	-16	46.0542	14.4696
Southeast	Slovenia	2016-07-19	Ljubljana ZOO	1	26	6.7	-17	46.0542	14.4696
Southeast	Slovenia	2016-07-29	Ljubljana ZOO	0	27	7.03333	-18	46.0542	14.4696
Southeast	Slovenia	2017-06-01	Ljubljana ZOO	0	26	5.06667	-15	46.0542	14.4696
Southeast	Slovenia	2017-06-15	Ljubljana ZOO	0	25	5.53333	-16	46.0542	14.4696
Southeast	Slovenia	2017-06-22	Ljubljana ZOO	0	30	5.76667	-16	46.0542	14.4696
Southeast	Slovenia	2017-06-29	Ljubljana ZOO	0	21	6	-16	46.0542	14.4696
Southeast	Slovenia	2017-07-07	Ljubljana ZOO	0	22	6.26667	-16	46.0542	14.4696
Southeast	Slovenia	2017-07-11	Ljubljana ZOO	0	30	6.4	-17	46.0542	14.4696
Southeast	Slovenia	2018-06-12	Ljubljana ZOO	0	22	5.43333	-15	46.0542	14.4696
Southeast	Slovenia	2018-06-21	Ljubljana ZOO	2	25	5.73333	-15	46.0542	14.4696
Southeast	Slovenia	2018-07-01	Ljubljana ZOO	0	18	6.06667	-16	46.0542	14.4696
Southeast	Slovenia	2018-07-04	Ljubljana ZOO	3	22	6.16667	-16	46.0542	14.4696
Southeast	Slovenia	2018-07-09	Ljubljana ZOO	0	21	6.33333	-16	46.0542	14.4696
Southeast	Slovenia	2018-07-19	Ljubljana ZOO	0	26	6.66667	-17	46.0542	14.4696
Southeast	Slovenia	2019-06-05	Ljubljana ZOO	0	24	5.2	-45	46.0542	14.4696
Southeast	Slovenia	2019-06-20	Ljubljana ZOO	0	23	5.7	-16	46.0542	14.4696
Southeast	Slovenia	2019-06-27	Ljubljana ZOO	0	32	5.93333	-16	46.0542	14.4696
Southeast	Slovenia	2020-06-13	Ljubljana ZOO	0	21	5.5	-15	46.0542	14.4696
Southeast	Slovenia	2020-06-30	Ljubljana ZOO	0	24	6.06667	-17	46.0542	14.4696
Southeast	Slovenia	2020-07-10	Ljubljana ZOO	0	28	6.4	-16	46.0542	14.4696
Southeast	Slovenia	2007-07-18	Lucan	1	NA	6.63333	20	45.5132	13.6179
Southeast	Slovenia	2007-07-19	Lucan	0	NA	6.66667	-19	45.5132	13.6179
Southeast	Slovenia	2007-07-26	Lucan	0	NA	6.9	-23	45.5132	13.6179
Southeast	Slovenia	2008-06-27	Lucan	2	NA	5.96667	-21	45.5132	13.6179
Southeast	Slovenia	2008-07-04	Lucan	0	NA	6.2	-13	45.5132	13.6179
Southeast	Slovenia	2009-06-05	Lucan	0	NA	5.2	NA	45.5132	13.6179
Southeast	Slovenia	2009-06-05	Lucan	0	NA	5.2	-4	45.5132	13.6179
Southeast	Slovenia	2009-07-03	Lucan	3	NA	6.13333	NA	45.5132	13.6179
Southeast	Slovenia	2009-07-03	Lucan	3	NA	6.13333	-43	45.5132	13.6179
Southeast	Slovenia	2009-07-06	Lucan	1	NA	6.23333	NA	45.5132	13.6179
Southeast	Slovenia	2009-07-06	Lucan	1	NA	6.23333	5	45.5132	13.6179
Southeast	Slovenia	2010-06-07	Lucan	0	17.5	5.26667	-41	45.5132	13.6179
Southeast	Slovenia	2010-06-24	Lucan	1	19.5	5.83333	-30	45.5132	13.6179
Southeast	Slovenia	2010-07-05	Lucan	2	25	6.2	-15	45.5132	13.6179
Southeast	Slovenia	2011-06-12	Lucan	0	NA	5.43333	-24	45.5132	13.6179
Southeast	Slovenia	2011-06-15	Lucan	0	21	5.53333	-34	45.5132	13.6179
Southeast	Slovenia	2011-07-04	Lucan	1	20	6.16667	-13	45.5132	13.6179
Southeast	Slovenia	2012-06-21	Lucan	0	21	5.76667	-1	45.5132	13.6179
Southeast	Slovenia	2014-06-05	Lucan	0	17	5.2	-16	45.5132	13.6179
Southeast	Slovenia	2014-06-21	Lucan	0	19	5.73333	-16	45.5132	13.6179
Southeast	Slovenia	2014-07-03	Lucan	1	18	6.13333	-15	45.5132	13.6179
Southeast	Slovenia	2016-06-07	Lucan	0	23	5.3	-15	45.5132	13.6179
Southeast	Slovenia	2016-06-23	Lucan	0	27	5.83333	-16	45.5132	13.6179
Southeast	Slovenia	2016-07-07	Lucan	0	28	6.3	-16	45.5132	13.6179
Southeast	Slovenia	2019-06-27	Lucan	6	28	5.93333	-16	45.5132	13.6179
Southeast	Slovenia	2007-07-13	Modraže-Hrastje	0	NA	6.46667	-19	46.3184	15.6313
Southeast	Slovenia	2007-07-14	Modraže-Hrastje	0	NA	6.5	-11	46.3184	15.6313
Southeast	Slovenia	2007-07-23	Modraže-Hrastje	0	NA	6.8	-12	46.3184	15.6313
Southeast	Slovenia	2008-06-19	Modraže-Hrastje	3	NA	5.7	2	46.3184	15.6313
Southeast	Slovenia	2008-06-25	Modraže-Hrastje	12	NA	5.9	-13	46.3184	15.6313
Southeast	Slovenia	2008-07-06	Modraže-Hrastje	3	NA	6.26667	-14	46.3184	15.6313
Southeast	Slovenia	2008-07-07	Modraže-Hrastje	4	NA	6.3	-2	46.3184	15.6313
Southeast	Slovenia	2008-07-25	Modraže-Hrastje	0	NA	6.9	-23	46.3184	15.6313
Southeast	Slovenia	2009-05-21	Modraže-Hrastje	0	23	4.7	NA	46.3184	15.6313
Southeast	Slovenia	2009-05-24	Modraže-Hrastje	0	22	4.8	NA	46.3184	15.6313
Southeast	Slovenia	2009-06-13	Modraže-Hrastje	7	20	5.46667	NA	46.3184	15.6313
Southeast	Slovenia	2009-06-14	Modraže-Hrastje	6	28	5.5	NA	46.3184	15.6313
Southeast	Slovenia	2009-06-27	Modraže-Hrastje	3	21	5.93333	NA	46.3184	15.6313
Southeast	Slovenia	2009-06-28	Modraže-Hrastje	2	19	5.96667	NA	46.3184	15.6313
Southeast	Slovenia	2009-06-29	Modraže-Hrastje	1	20	6	NA	46.3184	15.6313
Southeast	Slovenia	2009-06-30	Modraže-Hrastje	5	22	6.03333	NA	46.3184	15.6313
Southeast	Slovenia	2009-07-17	Modraže-Hrastje	0	28	6.6	NA	46.3184	15.6313
Southeast	Slovenia	2009-08-05	Modraže-Hrastje	0	21	7.23333	NA	46.3184	15.6313
Southeast	Slovenia	2010-06-05	Modraže-Hrastje	1	25	5.2	-1	46.3184	15.6313
Southeast	Slovenia	2010-06-06	Modraže-Hrastje	0	23	5.23333	-2	46.3184	15.6313
Southeast	Slovenia	2010-06-07	Modraže-Hrastje	2	21	5.26667	-3	46.3184	15.6313
Southeast	Slovenia	2010-06-08	Modraže-Hrastje	2	24	5.3	-5	46.3184	15.6313
Southeast	Slovenia	2010-06-18	Modraže-Hrastje	5	22	5.63333	-17	46.3184	15.6313
Southeast	Slovenia	2010-07-02	Modraže-Hrastje	9	29	6.1	-1	46.3184	15.6313
Southeast	Slovenia	2010-07-04	Modraže-Hrastje	13	22	6.16667	-18	46.3184	15.6313
Southeast	Slovenia	2010-07-05	Modraže-Hrastje	10	26	6.2	-6	46.3184	15.6313
Southeast	Slovenia	2011-06-02	Modraže-Hrastje	0	NA	5.1	-5	46.3184	15.6313
Southeast	Slovenia	2011-06-15	Modraže-Hrastje	3	26	5.53333	14	46.3184	15.6313
Southeast	Slovenia	2011-06-16	Modraže-Hrastje	0	22	5.56667	13	46.3184	15.6313
Southeast	Slovenia	2011-06-17	Modraže-Hrastje	3	28	5.6	17	46.3184	15.6313
Southeast	Slovenia	2011-06-20	Modraže-Hrastje	2	NA	5.7	16	46.3184	15.6313
Southeast	Slovenia	2011-06-21	Modraže-Hrastje	4	25	5.73333	6	46.3184	15.6313
Southeast	Slovenia	2011-07-15	Modraže-Hrastje	1	23	6.53333	-1	46.3184	15.6313
Southeast	Slovenia	2011-07-17	Modraže-Hrastje	2	NA	6.6	21	46.3184	15.6313
Southeast	Slovenia	2012-06-08	Modraže-Hrastje	0	23	5.33333	-13	46.3184	15.6313
Southeast	Slovenia	2012-06-15	Modraže-Hrastje	4	21.5	5.56667	-8	46.3184	15.6313
Southeast	Slovenia	2012-06-16	Modraže-Hrastje	3	24	5.6	0	46.3184	15.6313
Southeast	Slovenia	2012-06-21	Modraže-Hrastje	4	25	5.76667	0	46.3184	15.6313
Southeast	Slovenia	2012-07-14	Modraže-Hrastje	0	22.5	6.53333	2	46.3184	15.6313
Southeast	Slovenia	2013-06-07	Modraže-Hrastje	0	21	5.26667	-10	46.3184	15.6313
Southeast	Slovenia	2013-06-08	Modraže-Hrastje	0	18	5.3	0	46.3184	15.6313
Southeast	Slovenia	2013-06-22	Modraže-Hrastje	5	22	5.76667	-10	46.3184	15.6313
Southeast	Slovenia	2013-07-17	Modraže-Hrastje	7	21	6.6	-16	46.3184	15.6313
Southeast	Slovenia	2014-05-24	Modraže-Hrastje	0	22	4.8	-9	46.3184	15.6313
Southeast	Slovenia	2014-06-06	Modraže-Hrastje	0	21	5.23333	8	46.3184	15.6313
Southeast	Slovenia	2014-06-20	Modraže-Hrastje	0	14	5.7	-5	46.3184	15.6313
Southeast	Slovenia	2014-06-26	Modraže-Hrastje	4	25	5.9	-5	46.3184	15.6313
Southeast	Slovenia	2014-07-01	Modraže-Hrastje	2	NA	6.06667	9	46.3184	15.6313
Southeast	Slovenia	2014-07-25	Modraže-Hrastje	0	22	6.86667	7	46.3184	15.6313
Southeast	Slovenia	2015-06-05	Modraže-Hrastje	0	28	5.2	-13	46.3184	15.6313
Southeast	Slovenia	2015-06-20	Modraže-Hrastje	0	13	5.7	-14	46.3184	15.6313
Southeast	Slovenia	2015-07-11	Modraže-Hrastje	5	23	6.4	-10	46.3184	15.6313
Southeast	Slovenia	2016-06-04	Modraže-Hrastje	0	16	5.2	9	46.3184	15.6313
Southeast	Slovenia	2016-06-11	Modraže-Hrastje	0	21	5.43333	-10	46.3184	15.6313
Southeast	Slovenia	2016-06-18	Modraže-Hrastje	4	16	5.66667	-12	46.3184	15.6313
Southeast	Slovenia	2016-06-24	Modraže-Hrastje	5	26	5.86667	-11	46.3184	15.6313
Southeast	Slovenia	2016-07-02	Modraže-Hrastje	2	26	6.13333	-17	46.3184	15.6313
Southeast	Slovenia	2016-07-08	Modraže-Hrastje	4	23	6.33333	-11	46.3184	15.6313
Southeast	Slovenia	2016-07-15	Modraže-Hrastje	2	16	6.56667	-8	46.3184	15.6313
Southeast	Slovenia	2016-07-21	Modraže-Hrastje	2	23	6.76667	-7	46.3184	15.6313
Southeast	Slovenia	2016-07-29	Modraže-Hrastje	1	25	7.03333	10	46.3184	15.6313
Southeast	Slovenia	2017-06-04	Modraže-Hrastje	0	18	5.16667	-8	46.3184	15.6313
Southeast	Slovenia	2017-06-10	Modraže-Hrastje	1	23	5.36667	-2	46.3184	15.6313
Southeast	Slovenia	2017-06-15	Modraže-Hrastje	5	23	5.53333	-9	46.3184	15.6313
Southeast	Slovenia	2017-06-23	Modraže-Hrastje	12	25	5.8	-13	46.3184	15.6313
Southeast	Slovenia	2017-06-28	Modraže-Hrastje	8	24	5.96667	-17	46.3184	15.6313
Southeast	Slovenia	2018-06-02	Modraže-Hrastje	2	20	5.1	-39	46.3184	15.6313
Southeast	Slovenia	2018-06-24	Modraže-Hrastje	1	17	5.83333	-9	46.3184	15.6313
Southeast	Slovenia	2018-07-13	Modraže-Hrastje	2	21	6.46667	-13	46.3184	15.6313
Southeast	Slovenia	2018-07-25	Modraže-Hrastje	0	21	6.86667	-4	46.3184	15.6313
Southeast	Slovenia	2019-06-14	Modraže-Hrastje	0	31	5.5	-20	46.3184	15.6313
Southeast	Slovenia	2019-06-20	Modraže-Hrastje	3	NA	5.7	-2	46.3184	15.6313
Southeast	Slovenia	2019-07-15	Modraže-Hrastje	2	25	6.53333	-15	46.3184	15.6313
Southeast	Slovenia	2020-06-06	Modraže-Hrastje	1	22	5.26667	7	46.3184	15.6313
Southeast	Slovenia	2020-06-24	Modraže-Hrastje	7	20	5.86667	-7	46.3184	15.6313
Southeast	Slovenia	2020-07-04	Modraže-Hrastje	2	25	6.2	-8	46.3184	15.6313
Southeast	Slovenia	2020-07-12	Modraže-Hrastje	0	18	6.46667	2	46.3184	15.6313
Southeast	Slovenia	2007-07-19	Šmarna gora	1	NA	6.66667	-10	46.1273	16.4604
Southeast	Slovenia	2007-07-20	Šmarna gora	0	NA	6.7	-9	46.1273	16.4604
Southeast	Slovenia	2007-07-21	Šmarna gora	0	NA	6.73333	-8	46.1273	16.4604
Southeast	Slovenia	2008-06-21	Šmarna gora	0	NA	5.76667	-16	46.1273	16.4604
Southeast	Slovenia	2008-07-05	Šmarna gora	1	NA	6.23333	-9	46.1273	16.4604
Southeast	Slovenia	2008-07-12	Šmarna gora	1	NA	6.46667	0	46.1273	16.4604
Southeast	Slovenia	2009-06-18	Šmarna gora	1	NA	5.63333	NA	46.1273	16.4604
Southeast	Slovenia	2009-07-05	Šmarna gora	0	24.5	6.2	NA	46.1273	16.4604
Southeast	Slovenia	2009-07-15	Šmarna gora	1	28	6.53333	NA	46.1273	16.4604
Southeast	Slovenia	2010-07-01	Šmarna gora	1	NA	6.06667	-10	46.1273	16.4604
Southeast	Slovenia	2012-06-27	Šmarna gora	1	NA	5.96667	10	46.1273	16.4604
Southeast	Slovenia	2013-06-04	Šmarna gora	0	18	5.16667	-8	46.1273	16.4604
Southeast	Slovenia	2013-06-18	Šmarna gora	0	31	5.63333	-3	46.1273	16.4604
Southeast	Slovenia	2013-06-30	Šmarna gora	2	25	6.03333	2	46.1273	16.4604
Southeast	Slovenia	2015-07-03	Šmarna gora	2	26	6.13333	0	46.1273	16.4604
Southeast	Slovenia	2017-06-12	Šmarna gora	0	22	5.43333	-8	46.1273	16.4604
Southeast	Slovenia	2017-06-22	Šmarna gora	2	24	5.76667	-8	46.1273	16.4604
Southeast	Slovenia	2020-07-06	Šmarna gora	0	27	6.26667	-17	46.1273	16.4604
Southeast	Slovenia	2007-07-17	Vrej	2	26	6.6	-45	46.7431	16.1806
Southeast	Slovenia	2007-07-18	Vrej	1	27	6.63333	-44	46.7431	16.1806
Southeast	Slovenia	2007-07-25	Vrej	0	22	6.86667	-68	46.7431	16.1806
Southeast	Slovenia	2008-07-02	Vrej	4	25	6.13333	-53	46.7431	16.1806
Southeast	Slovenia	2009-06-17	Vrej	1	NA	5.6	NA	46.7431	16.1806
Southeast	Slovenia	2010-06-23	Vrej	3	NA	5.8	-9	46.7431	16.1806
Southeast	Slovenia	2011-07-09	Vrej	2	30	6.33333	-27	46.7431	16.1806
Southeast	Slovenia	2012-06-21	Vrej	13	28	5.76667	-9	46.7431	16.1806
Southeast	Slovenia	2014-06-04	Vrej	2	20	5.16667	-16	46.7431	16.1806
Southeast	Slovenia	2014-06-19	Vrej	5	22	5.66667	-23	46.7431	16.1806
Southeast	Slovenia	2014-07-01	Vrej	6	NA	6.06667	-4	46.7431	16.1806
Southeast	Slovenia	2016-05-31	Vrej	1	19	5.06667	-16	46.7431	16.1806
Southeast	Slovenia	2016-06-19	Vrej	0	25	5.7	-15	46.7431	16.1806
Southeast	Slovenia	2018-06-04	Vrej	6	22	5.16667	-14	46.7431	16.1806
Southeast	Slovenia	2018-06-06	Vrej	4	24	5.23333	-16	46.7431	16.1806
Southeast	Switzerland	2016-06-12	Neuchâtel, Colline du Plan	0	16	5.46667	2	46.9978	6.9254
Southeast	Switzerland	2016-06-18	Neuchâtel, Colline du Plan	0	16	5.66667	9	46.9978	6.9254
Southeast	Switzerland	2016-06-21	Neuchâtel, Colline du Plan	1	18	5.76667	13	46.9978	6.9254
Southeast	Switzerland	2016-06-24	Neuchâtel, Colline du Plan	6	25	5.86667	-2	46.9978	6.9254
Southeast	Switzerland	2016-06-27	Neuchâtel, Colline du Plan	2	21	5.96667	8	46.9978	6.9254
Southeast	Switzerland	2016-06-28	Neuchâtel, Colline du Plan	7	24	6	13	46.9978	6.9254
Southeast	Switzerland	2016-06-30	Neuchâtel, Colline du Plan	2	22	6.06667	8	46.9978	6.9254
Southeast	Switzerland	2017-06-01	Neuchâtel, Colline du Plan	1	22	5.06667	25	46.9978	6.9254
Southeast	Switzerland	2017-06-11	Neuchâtel, Colline du Plan	1	24	5.4	27	46.9978	6.9254
Southeast	Switzerland	2017-06-19	Neuchâtel, Colline du Plan	4	24	5.66667	13	46.9978	6.9254
Southeast	Switzerland	2017-06-27	Neuchâtel, Colline du Plan	0	23	5.93333	13	46.9978	6.9254
Southeast	Switzerland	2017-07-06	Neuchâtel, Colline du Plan	0	24	6.23333	15	46.9978	6.9254
Southeast	Switzerland	2017-07-07	Neuchâtel, Colline du Plan	0	26	6.26667	15	46.9978	6.9254
Southeast	Switzerland	2018-06-05	Neuchâtel, Colline du Plan	7	23	5.2	22	46.9978	6.9254
Southeast	Switzerland	2018-06-15	Neuchâtel, Colline du Plan	5	19	5.53333	10	46.9978	6.9254
Southeast	Switzerland	2018-07-09	Neuchâtel, Colline du Plan	0	22.7	6.33333	21	46.9978	6.9254
Southeast	Switzerland	2018-07-12	Neuchâtel, Colline du Plan	0	22	6.43333	18	46.9978	6.9254
Southeast	Switzerland	2018-07-14	Neuchâtel, Colline du Plan	0	24	6.5	9	46.9978	6.9254
Southeast	Switzerland	2018-07-19	Neuchâtel, Colline du Plan	0	25	6.66667	19	46.9978	6.9254
Southeast	Switzerland	2019-06-03	Neuchâtel, Colline du Plan	0	18	5.13333	14	46.9978	6.9254
Southeast	Switzerland	2019-06-04	Neuchâtel, Colline du Plan	0	21	5.16667	18	46.9978	6.9254
Southeast	Switzerland	2019-06-14	Neuchâtel, Colline du Plan	4	21	5.5	16	46.9978	6.9254
Southeast	Switzerland	2019-06-16	Neuchâtel, Colline du Plan	1	20	5.56667	15	46.9978	6.9254
Southeast	Switzerland	2019-06-30	Neuchâtel, Colline du Plan	3	28	6.03333	13	46.9978	6.9254
Southeast	Switzerland	2019-07-03	Neuchâtel, Colline du Plan	1	22	6.13333	14	46.9978	6.9254
Southeast	Switzerland	2020-05-31	Neuchâtel, Colline du Plan	2	19	5.06667	16	46.9978	6.9254
Southeast	Switzerland	2020-06-23	Neuchâtel, Colline du Plan	21	23	5.83333	8	46.9978	6.9254
Southeast	Switzerland	2020-07-03	Neuchâtel, Colline du Plan	1	18	6.16667	9	46.9978	6.9254
Southeast	Switzerland	2020-07-08	Neuchâtel, Colline du Plan	4	23	6.33333	11	46.9978	6.9254
Southeast	Switzerland	2020-07-11	Neuchâtel, Colline du Plan	0	19	6.43333	18	46.9978	6.9254
Southwest	France	2019-06-17	Faisan Doré	0	28	5.6	-16	44.5022	-0.578699
Southwest	France	2019-06-26	Faisan Doré	0	34	5.9	-19	44.5022	-0.578699
Southwest	France	2019-07-04	Faisan Doré	0	32	6.16667	-15	44.5022	-0.578699
Southwest	France	2019-07-16	Faisan Doré	0	29	6.56667	-17	44.5022	-0.578699
Southwest	France	2019-07-20	Faisan Doré	0	27	6.7	-17	44.5022	-0.578699
Southwest	Portugal	2020-06-04	Alheira1	0	19	5.2	-20	41.087	-8.5435
Southwest	Portugal	2020-06-10	Alheira1	0	16	5.4	-27	41.087	-8.5435
Southwest	Portugal	2020-06-17	Alheira1	0	17	5.63333	-24	41.087	-8.5435
Southwest	Portugal	2020-06-04	Amarante_Florestal	2	18	5.2	-16	41.2656	-8.08609
Southwest	Portugal	2020-06-11	Amarante_Florestal	0	15	5.43333	-15	41.2656	-8.08609
Southwest	Portugal	2020-06-18	Amarante_Florestal	2	18	5.66667	-17	41.2656	-8.08609
Southwest	Portugal	2020-06-25	Amarante_Florestal	0	22	5.9	-16	41.2656	-8.08609
Southwest	Portugal	2020-07-02	Amarante_Florestal	1	26	6.13333	-16	41.2656	-8.08609
Southwest	Portugal	2020-07-09	Amarante_Florestal	1	29	6.36667	-17	41.2656	-8.08609
Southwest	Portugal	2020-07-16	Amarante_Florestal	0	32	6.6	-15	41.2656	-8.08609
Southwest	Portugal	2020-07-23	Amarante_Florestal	0	32	6.83333	-10	41.2656	-8.08609
Southwest	Portugal	2020-07-30	Amarante_Florestal	1	24	7.06667	12	41.2656	-8.08609
Southwest	Portugal	2020-08-06	Amarante_Florestal	0	32	7.3	-16	41.2656	-8.08609
Southwest	Portugal	2020-06-20	Aveloso	1	22	5.73333	-18	40.8315	-8.04752
Southwest	Portugal	2020-06-04	Azenha - Frossos	4	19	5.2	-16	40.6564	-8.53811
Southwest	Portugal	2020-06-12	Azenha - Frossos	0	16	5.46667	-18	40.6564	-8.53811
Southwest	Portugal	2020-06-18	Azenha - Frossos	1	18	5.66667	-16	40.6564	-8.53811
Southwest	Portugal	2020-06-08	Barrosas - Lousada	4	15	5.33333	-6	41.3369	-8.27457
Southwest	Portugal	2020-06-06	Buçaco 1	0	14	5.26667	-17	40.3736	-8.36126
Southwest	Portugal	2020-06-13	Buçaco 1	0	17	5.5	-25	40.3736	-8.36126
Southwest	Portugal	2020-06-20	Buçaco 2	2	18	5.73333	-16	40.3762	-8.36605
Southwest	Portugal	2020-06-27	Buçaco 2	1	19	5.96667	-16	40.3762	-8.36605
Southwest	Portugal	2020-07-04	Buçaco 2	1	19	6.2	-16	40.3762	-8.36605
Southwest	Portugal	2020-07-12	Buçaco 2	3	24	6.46667	-16	40.3762	-8.36605
Southwest	Portugal	2020-07-18	Buçaco 2	3	24	6.66667	-16	40.3762	-8.36605
Southwest	Portugal	2020-07-24	Buçaco 2	4	19	6.86667	-16	40.3762	-8.36605
Southwest	Portugal	2020-08-01	Buçaco 2	2	16	7.13333	-19	40.3762	-8.36605
Southwest	Portugal	2020-08-08	Buçaco 2	0	19	7.36667	-17	40.3762	-8.36605
Southwest	Portugal	2020-06-02	Cais da Garrida Ecovia do Rio Lima	0	18	5.13333	-14	41.7817	-8.53947
Southwest	Portugal	2020-06-09	Cais da Garrida Ecovia do Rio Lima	1	20	5.36667	-14	41.7817	-8.53947
Southwest	Portugal	2020-06-16	Cais da Garrida Ecovia do Rio Lima	0	17	5.6	-17	41.7817	-8.53947
Southwest	Portugal	2020-06-23	Cais da Garrida Ecovia do Rio Lima	2	23	5.83333	-19	41.7817	-8.53947
Southwest	Portugal	2020-06-30	Cais da Garrida Ecovia do Rio Lima	0	24	6.06667	-19	41.7817	-8.53947
Southwest	Portugal	2020-07-07	Cais da Garrida Ecovia do Rio Lima	0	22	6.3	-17	41.7817	-8.53947
Southwest	Portugal	2020-07-07	Cais da Garrida Ecovia do Rio Lima	0	22	6.3	-17	41.7817	-8.53947
Southwest	Portugal	2020-07-14	Cais da Garrida Ecovia do Rio Lima	0	23	6.53333	-14	41.7817	-8.53947
Southwest	Portugal	2020-07-22	Cais da Garrida Ecovia do Rio Lima	1	28	6.8	-1	41.7817	-8.53947
Southwest	Portugal	2020-07-30	Cais da Garrida Ecovia do Rio Lima	0	22	7.06667	-20	41.7817	-8.53947
Southwest	Portugal	2020-08-04	Cais da Garrida Ecovia do Rio Lima	0	21	7.23333	-20	41.7817	-8.53947
Southwest	Portugal	2016-06-07	Carvalhal da Mó - Oliveira de Azeméis	0	22	5.3	0	40.8047	-8.45003
Southwest	Portugal	2016-06-16	Carvalhal da Mó - Oliveira de Azeméis	0	15	5.6	-33	40.8047	-8.45003
Southwest	Portugal	2016-06-23	Carvalhal da Mó - Oliveira de Azeméis	0	21	5.83333	-30	40.8047	-8.45003
Southwest	Portugal	2016-07-03	Carvalhal da Mó - Oliveira de Azeméis	5	25	6.16667	-70	40.8047	-8.45003
Southwest	Portugal	2016-07-15	Carvalhal da Mó - Oliveira de Azeméis	1	25	6.56667	-55	40.8047	-8.45003
Southwest	Portugal	2020-06-11	Casa do Rio	2	12	5.43333	8	41.3018	-8.21342
Southwest	Portugal	2020-06-18	Casa do Rio	6	17	5.66667	-20	41.3018	-8.21342
Southwest	Portugal	2020-06-25	Casa do Rio	10	19	5.9	-16	41.3018	-8.21342
Southwest	Portugal	2020-07-02	Casa do Rio	3	18	6.13333	-15	41.3018	-8.21342
Southwest	Portugal	2020-07-08	Casa do Rio	0	20	6.33333	-14	41.3018	-8.21342
Southwest	Portugal	2020-07-16	Casa do Rio	1	31	6.6	-15	41.3018	-8.21342
Southwest	Portugal	2020-07-22	Casa do Rio	0	25	6.8	-5	41.3018	-8.21342
Southwest	Portugal	2020-08-03	Casa do Rio	1	21	7.2	-14	41.3018	-8.21342
Southwest	Portugal	2020-08-06	Casa do Rio	1	25	7.3	-15	41.3018	-8.21342
Southwest	Portugal	2020-06-05	Cascata pequena	0	17	5.23333	-17	40.8706	-8.60674
Southwest	Portugal	2020-06-11	Cascata pequena	0	16	5.43333	-17	40.8706	-8.60674
Southwest	Portugal	2020-06-18	Cascata pequena	0	17	5.66667	-17	40.8706	-8.60674
Southwest	Portugal	2020-06-25	Cascata pequena	0	17	5.9	-17	40.8706	-8.60674
Southwest	Portugal	2020-07-02	Cascata pequena	0	17	6.13333	-17	40.8706	-8.60674
Southwest	Portugal	2020-07-09	Cascata pequena	0	20	6.36667	-17	40.8706	-8.60674
Southwest	Portugal	2020-07-16	Cascata pequena	0	25	6.6	-17	40.8706	-8.60674
Southwest	Portugal	2020-07-23	Cascata pequena	0	20	6.83333	-17	40.8706	-8.60674
Southwest	Portugal	2020-07-30	Cascata pequena	0	19	7.06667	-17	40.8706	-8.60674
Southwest	Portugal	2020-08-06	Cascata pequena	0	19	7.3	-18	40.8706	-8.60674
Southwest	Portugal	2020-06-05	Cerca do Mosteiro de Tibães	0	19	5.23333	-15	41.553	-8.47778
Southwest	Portugal	2020-06-12	Cerca do Mosteiro de Tibães	0	13	5.46667	-15	41.553	-8.47778
Southwest	Portugal	2020-06-19	Cerca do Mosteiro de Tibães	2	16	5.7	-17	41.553	-8.47778
Southwest	Portugal	2020-06-26	Cerca do Mosteiro de Tibães	2	17	5.93333	-18	41.553	-8.47778
Southwest	Portugal	2020-07-10	Cerca do Mosteiro de Tibães	1	27	6.4	-15	41.553	-8.47778
Southwest	Portugal	2020-07-17	Cerca do Mosteiro de Tibães	0	31	6.63333	-16	41.553	-8.47778
Southwest	Portugal	2020-07-24	Cerca do Mosteiro de Tibães	1	22	6.86667	-15	41.553	-8.47778
Southwest	Portugal	2020-07-31	Cerca do Mosteiro de Tibães	0	20	7.1	-19	41.553	-8.47778
Southwest	Portugal	2020-06-02	Couto do Mosteiro	0	15	5.13333	-16	40.4148	-8.14273
Southwest	Portugal	2020-06-09	Couto do Mosteiro	0	11	5.36667	-17	40.4148	-8.14273
Southwest	Portugal	2020-06-16	Couto do Mosteiro	0	12	5.6	-17	40.4148	-8.14273
Southwest	Portugal	2020-06-23	Couto do Mosteiro	0	16	5.83333	-7	40.4148	-8.14273
Southwest	Portugal	2020-06-30	Couto do Mosteiro	0	16	6.06667	-17	40.4148	-8.14273
Southwest	Portugal	2020-07-07	Couto do Mosteiro	0	25	6.3	-6	40.4148	-8.14273
Southwest	Portugal	2020-07-16	Couto do Mosteiro	0	29	6.6	0	40.4148	-8.14273
Southwest	Portugal	2020-07-21	Couto do Mosteiro	0	26	6.76667	-8	40.4148	-8.14273
Southwest	Portugal	2020-07-30	Couto do Mosteiro	0	25	7.06667	-10	40.4148	-8.14273
Southwest	Portugal	2020-08-04	Couto do Mosteiro	0	25	7.23333	-20	40.4148	-8.14273
Southwest	Portugal	2020-06-04	ESM	1	19	5.2	-15	41.5765	-8.34177
Southwest	Portugal	2020-06-11	ESM	0	13	5.43333	-16	41.5765	-8.34177
Southwest	Portugal	2020-06-18	ESM	0	18	5.66667	-16	41.5765	-8.34177
Southwest	Portugal	2020-06-25	ESM	0	20	5.9	-16	41.5765	-8.34177
Southwest	Portugal	2020-07-02	ESM	1	19	6.13333	-16	41.5765	-8.34177
Southwest	Portugal	2020-07-09	ESM	1	23	6.36667	-17	41.5765	-8.34177
Southwest	Portugal	2020-07-16	ESM	0	31	6.6	-17	41.5765	-8.34177
Southwest	Portugal	2020-07-23	ESM	1	22	6.83333	-17	41.5765	-8.34177
Southwest	Portugal	2020-07-30	ESM	0	20	7.06667	-17	41.5765	-8.34177
Southwest	Portugal	2020-08-06	ESM	0	25	7.3	-17	41.5765	-8.34177
Southwest	Portugal	2020-06-02	Fradelos	0	22	5.13333	-18	41.3606	-8.6062
Southwest	Portugal	2020-06-09	Fradelos	0	18	5.36667	-16	41.3606	-8.6062
Southwest	Portugal	2020-06-16	Fradelos	0	19	5.6	-15	41.3606	-8.6062
Southwest	Portugal	2020-06-23	Fradelos	0	20	5.83333	-15	41.3606	-8.6062
Southwest	Portugal	2020-06-30	Fradelos	0	21	6.06667	-31	41.3606	-8.6062
Southwest	Portugal	2020-07-07	Fradelos	0	22	6.3	-18	41.3606	-8.6062
Southwest	Portugal	2020-07-14	Fradelos	0	26	6.53333	-18	41.3606	-8.6062
Southwest	Portugal	2020-07-22	Fradelos	0	24	6.8	-22	41.3606	-8.6062
Southwest	Portugal	2020-07-28	Fradelos	0	23	7	-20	41.3606	-8.6062
Southwest	Portugal	2020-08-05	Fradelos	0	24	7.26667	-15	41.3606	-8.6062
Southwest	Portugal	2020-06-02	Franqueira	0	20	5.13333	-17	41.497	-8.64209
Southwest	Portugal	2020-06-09	Franqueira	0	18	5.36667	-12	41.497	-8.64209
Southwest	Portugal	2020-06-16	Franqueira	0	16	5.6	45	41.497	-8.64209
Southwest	Portugal	2020-06-23	Franqueira	0	19	5.83333	-19	41.497	-8.64209
Southwest	Portugal	2020-06-30	Franqueira	0	21	6.06667	-17	41.497	-8.64209
Southwest	Portugal	2020-07-07	Franqueira	0	20	6.3	-2	41.497	-8.64209
Southwest	Portugal	2020-07-13	Franqueira	0	25	6.5	-13	41.497	-8.64209
Southwest	Portugal	2020-07-21	Franqueira	0	25	6.76667	-10	41.497	-8.64209
Southwest	Portugal	2020-07-29	Franqueira	0	24	7.03333	-5	41.497	-8.64209
Southwest	Portugal	2020-08-06	Franqueira	0	21	7.3	-5	41.497	-8.64209
Southwest	Portugal	2020-06-03	Maia_1	0	20	5.16667	-16	41.2234	-8.62061
Southwest	Portugal	2020-06-09	Maia_1	0	19	5.36667	-17	41.2234	-8.62061
Southwest	Portugal	2020-06-16	Maia_1	1	18	5.6	-15	41.2234	-8.62061
Southwest	Portugal	2020-06-22	Maia_1	1	20	5.8	-17	41.2234	-8.62061
Southwest	Portugal	2020-06-30	Maia_1	0	19	6.06667	-12	41.2234	-8.62061
Southwest	Portugal	2020-06-04	Mata Nacional de Foja	0	22	5.2	-11	40.1987	-8.71922
Southwest	Portugal	2020-06-11	Mata Nacional de Foja	0	17	5.43333	-10	40.1987	-8.71922
Southwest	Portugal	2020-06-18	Mata Nacional de Foja	0	19	5.66667	-18	40.1987	-8.71922
Southwest	Portugal	2020-06-25	Mata Nacional de Foja	0	20	5.9	-19	40.1987	-8.71922
Southwest	Portugal	2020-06-04	Monserrate	0	20	5.2	-16	38.7896	-9.42051
Southwest	Portugal	2020-06-14	Monserrate	0	20	5.53333	-14	38.7896	-9.42051
Southwest	Portugal	2016-06-10	Nespereira, Lousada	0	18	5.4	-31	41.2537	-8.29444
Southwest	Portugal	2016-06-19	Nespereira, Lousada	3	23	5.7	-30	41.2537	-8.29444
Southwest	Portugal	2016-06-26	Nespereira, Lousada	0	26	5.93333	-16	41.2537	-8.29444
Southwest	Portugal	2016-07-03	Nespereira, Lousada	0	29	6.16667	-20	41.2537	-8.29444
Southwest	Portugal	2016-07-03	Nespereira, Lousada	0	29	6.16667	-20	41.2537	-8.29444
Southwest	Portugal	2016-07-10	Nespereira, Lousada	1	17	6.4	-13	41.2537	-8.29444
Southwest	Portugal	2016-07-17	Nespereira, Lousada	0	17	6.63333	-19	41.2537	-8.29444
Southwest	Portugal	2016-07-24	Nespereira, Lousada	0	23	6.86667	-19	41.2537	-8.29444
Southwest	Portugal	2016-07-31	Nespereira, Lousada	1	20	7.1	0	41.2537	-8.29444
Southwest	Portugal	2020-07-03	Nossa Senhora da Encarnação	0	22	6.16667	-27	39.7388	-8.79903
Southwest	Portugal	2020-07-10	Nossa Senhora da Encarnação	0	22	6.4	-25	39.7388	-8.79903
Southwest	Portugal	2020-07-17	Nossa Senhora da Encarnação	0	23	6.63333	-17	39.7388	-8.79903
Southwest	Portugal	2020-07-24	Nossa Senhora da Encarnação	0	24	6.86667	-12	39.7388	-8.79903
Southwest	Portugal	2020-07-31	Nossa Senhora da Encarnação	0	20	7.1	-20	39.7388	-8.79903
Southwest	Portugal	2020-08-07	Nossa Senhora da Encarnação	0	23	7.33333	-13	39.7388	-8.79903
Southwest	Portugal	2020-06-02	Parque Urbano Sara Moreira	2	21	5.13333	-16	41.3558	-8.46128
Southwest	Portugal	2020-06-09	Parque Urbano Sara Moreira	1	16	5.36667	-15	41.3558	-8.46128
Southwest	Portugal	2020-06-16	Parque Urbano Sara Moreira	9	16	5.6	-17	41.3558	-8.46128
Southwest	Portugal	2020-06-24	Parque Urbano Sara Moreira	2	17	5.86667	-16	41.3558	-8.46128
Southwest	Portugal	2020-06-30	Parque Urbano Sara Moreira	2	19	6.06667	-18	41.3558	-8.46128
Southwest	Portugal	2020-07-07	Parque Urbano Sara Moreira	3	24	6.3	-16	41.3558	-8.46128
Southwest	Portugal	2020-07-14	Parque Urbano Sara Moreira	1	24	6.53333	-17	41.3558	-8.46128
Southwest	Portugal	2020-07-22	Parque Urbano Sara Moreira	3	26	6.8	-16	41.3558	-8.46128
Southwest	Portugal	2020-07-28	Parque Urbano Sara Moreira	0	24	7	-17	41.3558	-8.46128
Southwest	Portugal	2020-08-02	Parque Urbano Sara Moreira	0	21	7.16667	-17	41.3558	-8.46128
Southwest	Portugal	2020-06-04	ParqueVerde	0	20	5.2	-16	41.7268	-8.67868
Southwest	Portugal	2020-06-11	ParqueVerde	0	13	5.43333	-20	41.7268	-8.67868
Southwest	Portugal	2020-06-17	ParqueVerde	0	19	5.63333	-17	41.7268	-8.67868
Southwest	Portugal	2020-06-25	ParqueVerde	0	19	5.9	-10	41.7268	-8.67868
Southwest	Portugal	2020-07-02	ParqueVerde	0	20	6.13333	-18	41.7268	-8.67868
Southwest	Portugal	2020-07-07	ParqueVerde	0	20	6.3	-12	41.7268	-8.67868
Southwest	Portugal	2020-07-10	ParqueVerde	0	23	6.4	-6	41.7268	-8.67868
Southwest	Portugal	2020-07-23	ParqueVerde	0	22	6.83333	-18	41.7268	-8.67868
Southwest	Portugal	2020-07-30	ParqueVerde	0	18	7.06667	-16	41.7268	-8.67868
Southwest	Portugal	2020-08-06	ParqueVerde	0	22	7.3	-18	41.7268	-8.67868
Southwest	Portugal	2020-06-04	ParqueVizela	5	19	5.2	-12	41.3723	-8.30169
Southwest	Portugal	2020-06-11	ParqueVizela	1	13	5.43333	-17	41.3723	-8.30169
Southwest	Portugal	2020-06-16	ParqueVizela	1	17	5.6	-10	41.3723	-8.30169
Southwest	Portugal	2020-06-25	ParqueVizela	5	20	5.9	-15	41.3723	-8.30169
Southwest	Portugal	2020-07-02	ParqueVizela	3	19	6.13333	-12	41.3723	-8.30169
Southwest	Portugal	2020-07-09	ParqueVizela	1	23	6.36667	-17	41.3723	-8.30169
Southwest	Portugal	2020-07-23	ParqueVizela	0	22	6.83333	-20	41.3723	-8.30169
Southwest	Portugal	2020-07-30	ParqueVizela	0	20	7.06667	-17	41.3723	-8.30169
Southwest	Portugal	2020-08-06	ParqueVizela	0	24	7.3	-15	41.3723	-8.30169
Southwest	Portugal	2020-06-02	Passadiços do Paiva	0	18	5.13333	-13	40.9772	-8.18997
Southwest	Portugal	2020-06-04	Passadiços do Paiva	0	16	5.2	-16	40.9772	-8.18997
Southwest	Portugal	2020-06-09	Passadiços do Paiva	0	16	5.36667	-15	40.9772	-8.18997
Southwest	Portugal	2020-06-19	Passadiços do Paiva	0	16	5.7	-16	40.9772	-8.18997
Southwest	Portugal	2020-06-30	Passadiços do Paiva	0	21	6.06667	-17	40.9772	-8.18997
Southwest	Portugal	2020-07-11	Passadiços do Paiva	0	24	6.43333	-16	40.9772	-8.18997
Southwest	Portugal	2020-06-09	PBG 1	0	18	5.36667	-21	41.1001	-8.56046
Southwest	Portugal	2020-06-16	PBG 1	0	18	5.6	-20	41.1001	-8.56046
Southwest	Portugal	2020-06-24	PBG 1	0	18	5.86667	-21	41.1001	-8.56046
Southwest	Portugal	2020-06-30	PBG 1	0	21	6.06667	-16	41.1001	-8.56046
Southwest	Portugal	2020-07-07	PBG 1	0	21	6.3	-15	41.1001	-8.56046
Southwest	Portugal	2020-07-14	PBG 1	0	22	6.53333	-12	41.1001	-8.56046
Southwest	Portugal	2020-07-21	PBG 1	0	27	6.76667	-17	41.1001	-8.56046
Southwest	Portugal	2020-07-28	PBG 1	0	21	7	-17	41.1001	-8.56046
Southwest	Portugal	2020-08-04	PBG 1	0	20	7.23333	-8	41.1001	-8.56046
Southwest	Portugal	2020-06-03	Penha	0	17	5.16667	-15	41.4288	-8.26821
Southwest	Portugal	2020-06-10	Penha	8	16	5.4	-17	41.4288	-8.26821
Southwest	Portugal	2020-06-17	Penha	2	16	5.63333	-16	41.4288	-8.26821
Southwest	Portugal	2020-06-24	Penha	2	21	5.86667	-11	41.4288	-8.26821
Southwest	Portugal	2020-07-01	Penha	1	19	6.1	-16	41.4288	-8.26821
Southwest	Portugal	2020-07-08	Penha	3	20	6.33333	-16	41.4288	-8.26821
Southwest	Portugal	2020-07-15	Penha	2	29	6.56667	-16	41.4288	-8.26821
Southwest	Portugal	2020-07-22	Penha	0	25	6.8	-17	41.4288	-8.26821
Southwest	Portugal	2020-07-29	Penha	0	25	7.03333	-16	41.4288	-8.26821
Southwest	Portugal	2020-08-05	Penha	0	26	7.26667	-17	41.4288	-8.26821
Southwest	Portugal	2020-06-17	Ponte de Lima I	2	17	5.63333	-17	41.7633	-8.57534
Southwest	Portugal	2020-06-23	Ponte de Lima I	0	18	5.83333	16	41.7633	-8.57534
Southwest	Portugal	2020-06-30	Ponte de Lima I	0	20	6.06667	-44	41.7633	-8.57534
Southwest	Portugal	2020-07-07	Ponte de Lima I	3	21	6.3	-17	41.7633	-8.57534
Southwest	Portugal	2020-07-14	Ponte de Lima I	1	25	6.53333	16	41.7633	-8.57534
Southwest	Portugal	2020-07-21	Ponte de Lima I	0	26	6.76667	21	41.7633	-8.57534
Southwest	Portugal	2020-07-14	Pousos	0	24	6.53333	-14	39.7424	-8.78738
Southwest	Portugal	2020-07-20	Pousos	0	24	6.73333	-10	39.7424	-8.78738
Southwest	Portugal	2020-07-27	Pousos	0	23	6.96667	-4	39.7424	-8.78738
Southwest	Portugal	2020-08-03	Pousos	0	20	7.2	-7	39.7424	-8.78738
Southwest	Portugal	2020-08-10	Pousos	0	22	7.43333	-19	39.7424	-8.78738
Southwest	Portugal	2020-08-17	Pousos	0	18	7.66667	-10	39.7424	-8.78738
Southwest	Portugal	2016-06-18	Presinhas -Baraçal	0	16	5.66667	-17	40.4197	-7.14306
Southwest	Portugal	2016-06-24	Presinhas -Baraçal	3	23	5.86667	-16	40.4197	-7.14306
Southwest	Portugal	2016-07-23	Presinhas -Baraçal	2	27	6.83333	-30	40.4197	-7.14306
Southwest	Portugal	2016-07-30	Presinhas -Baraçal	0	24	7.06667	-31	40.4197	-7.14306
Southwest	Portugal	2017-07-02	Presinhas -Baraçal	3	24	6.1	-17	40.4197	-7.14306
Southwest	Portugal	2017-07-09	Presinhas -Baraçal	2	26	6.33333	-27	40.4197	-7.14306
Southwest	Portugal	2017-07-16	Presinhas -Baraçal	0	28	6.56667	-24	40.4197	-7.14306
Southwest	Portugal	2018-06-23	Presinhas -Baraçal	1	28	5.8	-29	40.4197	-7.14306
Southwest	Portugal	2018-07-07	Presinhas -Baraçal	5	24	6.26667	-30	40.4197	-7.14306
Southwest	Portugal	2020-06-02	Provisory Transect (Paço forest)	0	20	5.13333	-31	40.6677	-8.63036
Southwest	Portugal	2020-06-09	Provisory Transect (Paço forest)	0	16	5.36667	-35	40.6677	-8.63036
Southwest	Portugal	2020-06-02	Quinta do Cáscere	0	20	5.13333	-6	41.2528	-8.30071
Southwest	Portugal	2020-06-09	Quinta do Cáscere	0	18	5.36667	-16	41.2528	-8.30071
Southwest	Portugal	2020-06-16	Quinta do Cáscere	0	16	5.6	-19	41.2528	-8.30071
Southwest	Portugal	2020-06-23	Quinta do Cáscere	0	22	5.83333	-11	41.2528	-8.30071
Southwest	Portugal	2020-06-30	Quinta do Cáscere	0	21	6.06667	-11	41.2528	-8.30071
Southwest	Portugal	2020-07-07	Quinta do Cáscere	0	25	6.3	-4	41.2528	-8.30071
Southwest	Portugal	2020-07-14	Quinta do Cáscere	0	24	6.53333	-11	41.2528	-8.30071
Southwest	Portugal	2020-07-21	Quinta do Cáscere	1	26	6.76667	-10	41.2528	-8.30071
Southwest	Portugal	2020-08-01	Quinta do Cáscere	0	21	7.13333	-11	41.2528	-8.30071
Southwest	Portugal	2020-08-04	Quinta do Cáscere	0	20	7.23333	-13	41.2528	-8.30071
Southwest	Portugal	2020-06-02	RegaleiraS2020	0	22	5.13333	-18	38.7951	-9.39674
Southwest	Portugal	2020-06-09	RegaleiraS2020	0	19	5.36667	-17	38.7951	-9.39674
Southwest	Portugal	2020-06-16	RegaleiraS2020	1	22	5.6	-15	38.7951	-9.39674
Southwest	Portugal	2020-06-30	RegaleiraS2020	2	19	6.06667	-12	38.7951	-9.39674
Southwest	Portugal	2020-07-07	RegaleiraS2020	1	19	6.3	-16	38.7951	-9.39674
Southwest	Portugal	2020-07-13	RegaleiraS2020	0	19	6.5	-14	38.7951	-9.39674
Southwest	Portugal	2020-07-21	RegaleiraS2020	2	19	6.76667	-16	38.7951	-9.39674
Southwest	Portugal	2020-07-28	RegaleiraS2020	0	18	7	-18	38.7951	-9.39674
Southwest	Portugal	2020-06-04	Retorta 1	0	17	5.2	-15	40.0588	-8.36276
Southwest	Portugal	2020-06-11	Retorta 1	0	14	5.43333	-8	40.0588	-8.36276
Southwest	Portugal	2020-06-18	Retorta 1	0	17	5.66667	-25	40.0588	-8.36276
Southwest	Portugal	2020-06-25	Retorta 1	0	18	5.9	-10	40.0588	-8.36276
Southwest	Portugal	2020-07-02	Retorta 1	0	18	6.13333	-10	40.0588	-8.36276
Southwest	Portugal	2020-07-09	Retorta 1	0	24	6.36667	-16	40.0588	-8.36276
Southwest	Portugal	2020-07-16	Retorta 1	0	29	6.6	-16	40.0588	-8.36276
Southwest	Portugal	2020-07-23	Retorta 1	0	22	6.83333	-17	40.0588	-8.36276
Southwest	Portugal	2020-07-30	Retorta 1	1	25	7.06667	-1	40.0588	-8.36276
Southwest	Portugal	2020-08-06	Retorta 1	0	23	7.3	-18	40.0588	-8.36276
Southwest	Portugal	2020-06-02	Rua da Agra	0	21	5.13333	-20	41.2574	-8.42802
Southwest	Portugal	2020-06-09	Rua da Agra	0	17	5.36667	-18	41.2574	-8.42802
Southwest	Portugal	2020-06-16	Rua de Moinhos	2	15	5.6	-13	41.2759	-8.35295
Southwest	Portugal	2020-06-22	Rua de Moinhos	1	23	5.8	-10	41.2759	-8.35295
Southwest	Portugal	2020-06-30	Rua de Moinhos	2	21	6.06667	-11	41.2759	-8.35295
Southwest	Portugal	2020-07-07	Rua de Moinhos	2	24	6.3	-16	41.2759	-8.35295
Southwest	Portugal	2020-07-14	Rua de Moinhos	0	24	6.53333	-28	41.2759	-8.35295
Southwest	Portugal	2020-07-21	Rua de Moinhos	2	29	6.76667	-13	41.2759	-8.35295
Southwest	Portugal	2020-08-04	Rua de Moinhos	0	24	7.23333	-13	41.2759	-8.35295
Southwest	Portugal	2016-06-04	Santa Maria da Feira	0	17	5.2	-16	40.92	-8.54399
Southwest	Portugal	2016-06-11	Santa Maria da Feira	0	18	5.43333	-16	40.92	-8.54399
Southwest	Portugal	2016-06-18	Santa Maria da Feira	1	18	5.66667	-17	40.92	-8.54399
Southwest	Portugal	2016-06-24	Santa Maria da Feira	0	18	5.86667	-16	40.92	-8.54399
Southwest	Portugal	2016-07-09	Santa Maria da Feira	0	18	6.36667	-16	40.92	-8.54399
Southwest	Portugal	2016-07-15	Santa Maria da Feira	0	20	6.56667	-16	40.92	-8.54399
Southwest	Portugal	2016-07-23	Santa Maria da Feira	0	21	6.83333	-17	40.92	-8.54399
Southwest	Portugal	2020-06-04	São Pedro de Agostém, Chaves	0	18	5.2	-16	41.7006	-7.50198
Southwest	Portugal	2020-06-11	São Pedro de Agostém, Chaves	0	14	5.43333	-16	41.7006	-7.50198
Southwest	Portugal	2020-06-18	São Pedro de Agostém, Chaves	0	17	5.66667	-16	41.7006	-7.50198
Southwest	Portugal	2020-06-25	São Pedro de Agostém, Chaves	0	20	5.9	-17	41.7006	-7.50198
Southwest	Portugal	2020-07-02	São Pedro de Agostém, Chaves	0	19	6.13333	-18	41.7006	-7.50198
Southwest	Portugal	2020-07-09	São Pedro de Agostém, Chaves	0	23	6.36667	-16	41.7006	-7.50198
Southwest	Portugal	2020-07-16	São Pedro de Agostém, Chaves	0	28	6.6	-16	41.7006	-7.50198
Southwest	Portugal	2020-07-24	São Pedro de Agostém, Chaves	0	27	6.86667	-16	41.7006	-7.50198
Southwest	Portugal	2020-07-30	São Pedro de Agostém, Chaves	0	29	7.06667	-16	41.7006	-7.50198
Southwest	Portugal	2020-08-06	São Pedro de Agostém, Chaves	0	30	7.3	-17	41.7006	-7.50198
Southwest	Portugal	2020-06-04	Torno the first	0	18	5.2	-16	41.3035	-8.2126
Southwest	Portugal	2020-06-04	Valinhas	3	17	5.2	-16	41.3059	-8.44937
Southwest	Portugal	2020-06-15	Valinhas	6	16	5.56667	-17	41.3059	-8.44937
Southwest	Portugal	2020-06-18	Valinhas	6	18	5.66667	-18	41.3059	-8.44937
Southwest	Portugal	2020-06-25	Valinhas	11	18	5.9	-16	41.3059	-8.44937
Southwest	Portugal	2020-07-02	Valinhas	6	19	6.13333	-16	41.3059	-8.44937
Southwest	Portugal	2020-07-09	Valinhas	9	24	6.36667	-16	41.3059	-8.44937
Southwest	Portugal	2020-07-16	Valinhas	3	31	6.6	-17	41.3059	-8.44937
Southwest	Portugal	2020-07-23	Valinhas	2	23	6.83333	-16	41.3059	-8.44937
Southwest	Portugal	2020-07-30	Valinhas	3	20	7.06667	-18	41.3059	-8.44937
Southwest	Portugal	2020-08-07	Valinhas	1	21	7.33333	-18	41.3059	-8.44937
Southwest	Spain	2017-06-20	Bribes - Veiga	7	27.9	5.7	-16	43.2814	-8.3065
Southwest	Spain	2017-07-03	Bribes - Veiga	5	28.5	6.13333	-17	43.2814	-8.3065
Southwest	Spain	2017-07-06	Bribes - Veiga	6	21.4	6.23333	-16	43.2814	-8.3065
Southwest	Spain	2017-07-11	Bribes - Veiga	13	21.5	6.4	-17	43.2814	-8.3065
Southwest	Spain	2017-08-01	Bribes - Veiga	1	23.9	7.1	-16	43.2814	-8.3065
Southwest	Spain	2017-08-07	Bribes - Veiga	1	25.7	7.3	-17	43.2814	-8.3065
Southwest	Spain	2018-07-10	Bribes - Veiga	10	28.3	6.36667	-14	43.2814	-8.3065
Southwest	Spain	2018-07-17	Bribes - Veiga	3	22.4	6.6	-15	43.2814	-8.3065
Southwest	Spain	2018-07-24	Bribes - Veiga	2	24.2	6.83333	-17	43.2814	-8.3065
Southwest	Spain	2018-07-27	Bribes - Veiga	0	24.6	6.93333	-16	43.2814	-8.3065
Southwest	Spain	2018-08-01	Bribes - Veiga	0	27	7.1	-16	43.2814	-8.3065
Southwest	Spain	2019-07-12	Bribes - Veiga	13	26	6.43333	-16	43.2814	-8.3065
Southwest	Spain	2019-07-22	Bribes - Veiga	3	28.4	6.76667	-13	43.2814	-8.3065
Southwest	Spain	2019-08-01	Bribes - Veiga	0	24.4	7.1	-16	43.2814	-8.3065
Southwest	Spain	2019-08-06	Bribes - Veiga	0	23	7.26667	-17	43.2814	-8.3065
Southwest	Spain	2019-08-15	Bribes - Veiga	0	23	7.56667	-17	43.2814	-8.3065
Southwest	Spain	2020-06-19	Bribes - Veiga	8	23.2	5.7	0	43.2814	-8.3065
Southwest	Spain	2020-06-30	Bribes - Veiga	8	25.4	6.06667	-1	43.2814	-8.3065
Southwest	Spain	2020-07-07	Bribes - Veiga	4	27	6.3	-1	43.2814	-8.3065
Southwest	Spain	2020-07-14	Bribes - Veiga	9	25	6.53333	-1	43.2814	-8.3065
Southwest	Spain	2020-07-21	Bribes - Veiga	4	26	6.76667	-1	43.2814	-8.3065
Southwest	Spain	2020-08-04	Bribes - Veiga	2	25.6	7.23333	-2	43.2814	-8.3065
Southwest	Spain	2017-07-04	Bribes - Vilar	0	17.2	6.16667	-16	43.2696	-8.30803
Southwest	Spain	2020-06-20	Cambas	0	18	5.73333	-16	43.2507	-7.98682
Southwest	Spain	2020-07-04	Cambas	0	18	6.2	-16	43.2507	-7.98682
Southwest	Spain	2020-07-11	Cambas	0	17.5	6.43333	-13	43.2507	-7.98682
Southwest	Spain	2020-07-18	Cambas	0	18	6.66667	-17	43.2507	-7.98682
Southwest	Spain	2020-07-25	Cambas	0	20	6.9	-12	43.2507	-7.98682
Southwest	Spain	2020-08-02	Cambas	0	21	7.16667	-14	43.2507	-7.98682
Southwest	Spain	2017-07-13	Castro Caldelas	0	14	6.46667	-7	42.3716	-7.34739
Southwest	Spain	2017-05-30	Dehesa Horcajo	0	18.5	5	-16	41.0748	-3.57509
Southwest	Spain	2017-06-08	Dehesa Horcajo	6	20	5.3	-21	41.0748	-3.57509
Southwest	Spain	2017-06-14	Dehesa Horcajo	7	25	5.5	-19	41.0748	-3.57509
Southwest	Spain	2017-06-21	Dehesa Horcajo	7	23	5.73333	-19	41.0748	-3.57509
Southwest	Spain	2017-07-04	Dehesa Horcajo	1	23	6.16667	-21	41.0748	-3.57509
Southwest	Spain	2017-07-12	Dehesa Horcajo	1	24	6.43333	-21	41.0748	-3.57509
Southwest	Spain	2018-06-06	Dehesa Horcajo	0	12	5.23333	-31	41.0748	-3.57509
Southwest	Spain	2018-06-12	Dehesa Horcajo	0	13	5.43333	-23	41.0748	-3.57509
Southwest	Spain	2018-06-17	Dehesa Horcajo	0	17	5.6	-20	41.0748	-3.57509
Southwest	Spain	2018-06-21	Dehesa Horcajo	7	23	5.73333	-19	41.0748	-3.57509
Southwest	Spain	2018-06-30	Dehesa Horcajo	1	22	6.03333	-16	41.0748	-3.57509
Southwest	Spain	2018-07-05	Dehesa Horcajo	1	17	6.2	-16	41.0748	-3.57509
Southwest	Spain	2018-07-12	Dehesa Horcajo	1	20	6.43333	-11	41.0748	-3.57509
Southwest	Spain	2018-07-17	Dehesa Horcajo	2	22	6.6	-13	41.0748	-3.57509
Southwest	Spain	2019-06-03	Dehesa Horcajo	0	22	5.13333	-32	41.0748	-3.57509
Southwest	Spain	2019-06-08	Dehesa Horcajo	0	18	5.3	-15	41.0748	-3.57509
Southwest	Spain	2019-06-13	Dehesa Horcajo	2	17	5.46667	-16	41.0748	-3.57509
Southwest	Spain	2019-06-20	Dehesa Horcajo	5	19	5.7	-21	41.0748	-3.57509
Southwest	Spain	2019-06-26	Dehesa Horcajo	4	27.5	5.9	-16	41.0748	-3.57509
Southwest	Spain	2019-06-30	Dehesa Horcajo	4	28	6.03333	-16	41.0748	-3.57509
Southwest	Spain	2019-07-04	Dehesa Horcajo	3	25	6.16667	-16	41.0748	-3.57509
Southwest	Spain	2019-07-10	Dehesa Horcajo	0	26.5	6.36667	-28	41.0748	-3.57509
Southwest	Spain	2017-06-14	Del peral en adelante	2	21	5.5	-16	42.0983	-8.75655
Southwest	Spain	2017-06-21	Del peral en adelante	0	22	5.73333	-16	42.0983	-8.75655
Southwest	Spain	2017-06-26	Del peral en adelante	0	21	5.9	-16	42.0983	-8.75655
Southwest	Spain	2017-07-05	Del peral en adelante	1	23	6.2	-17	42.0983	-8.75655
Southwest	Spain	2017-07-12	Del peral en adelante	0	24	6.43333	-17	42.0983	-8.75655
Southwest	Spain	2017-07-20	Del peral en adelante	0	19	6.7	-17	42.0983	-8.75655
Southwest	Spain	2017-07-26	Del peral en adelante	3	21	6.9	-16	42.0983	-8.75655
Southwest	Spain	2017-07-31	Del peral en adelante	3	19	7.06667	-17	42.0983	-8.75655
Southwest	Spain	2018-06-24	Del peral en adelante	0	19	5.83333	-16	42.0983	-8.75655
Southwest	Spain	2018-06-30	Del peral en adelante	0	18	6.03333	-16	42.0983	-8.75655
Southwest	Spain	2018-07-07	Del peral en adelante	4	20	6.26667	-16	42.0983	-8.75655
Southwest	Spain	2018-07-13	Del peral en adelante	11	19	6.46667	-15	42.0983	-8.75655
Southwest	Spain	2018-07-18	Del peral en adelante	5	17	6.63333	-16	42.0983	-8.75655
Southwest	Spain	2018-07-25	Del peral en adelante	4	17	6.86667	-17	42.0983	-8.75655
Southwest	Spain	2019-06-21	Del peral en adelante	0	18	5.73333	-15	42.0983	-8.75655
Southwest	Spain	2019-06-29	Del peral en adelante	0	18	6	-16	42.0983	-8.75655
Southwest	Spain	2019-07-07	Del peral en adelante	0	20	6.26667	-16	42.0983	-8.75655
Southwest	Spain	2019-07-14	Del peral en adelante	0	20	6.5	-16	42.0983	-8.75655
Southwest	Spain	2019-07-21	Del peral en adelante	0	23	6.73333	-16	42.0983	-8.75655
Southwest	Spain	2019-07-29	Del peral en adelante	0	18	7	-16	42.0983	-8.75655
Southwest	Spain	2020-06-21	Del peral en adelante	0	19	5.76667	-15	42.0983	-8.75655
Southwest	Spain	2020-06-28	Del peral en adelante	0	19	6	-16	42.0983	-8.75655
Southwest	Spain	2020-07-05	Del peral en adelante	0	26	6.23333	-16	42.0983	-8.75655
Southwest	Spain	2020-07-13	Del peral en adelante	0	25	6.5	-16	42.0983	-8.75655
Southwest	Spain	2020-07-20	Del peral en adelante	0	24	6.73333	-16	42.0983	-8.75655
Southwest	Spain	2020-07-26	Del peral en adelante	0	18	6.93333	-16	42.0983	-8.75655
Southwest	Spain	2017-06-20	Elviña	0	20	5.7	-20	43.332	-8.41595
Southwest	Spain	2017-07-01	Elviña	1	15	6.06667	-18	43.332	-8.41595
Southwest	Spain	2017-07-03	Elviña	3	19	6.13333	-18	43.332	-8.41595
Southwest	Spain	2017-07-13	Elviña	1	17	6.46667	-16	43.332	-8.41595
Southwest	Spain	2017-07-17	Elviña	1	19	6.6	-21	43.332	-8.41595
Southwest	Spain	2017-07-26	Elviña	0	17	6.9	-19	43.332	-8.41595
Southwest	Spain	2018-06-29	Elviña	0	23	6	-24	43.332	-8.41595
Southwest	Spain	2018-07-05	Elviña	0	17	6.2	-18	43.332	-8.41595
Southwest	Spain	2018-07-09	Elviña	0	24.7	6.33333	-21	43.332	-8.41595
Southwest	Spain	2018-07-23	Elviña	0	20	6.8	-15	43.332	-8.41595
Southwest	Spain	2018-08-04	Elviña	0	27	7.2	-14	43.332	-8.41595
Southwest	Spain	2018-08-10	Elviña	0	28	7.4	-22	43.332	-8.41595
Southwest	Spain	2019-07-03	Elviña	0	22	6.13333	-17	43.332	-8.41595
Southwest	Spain	2019-07-10	Elviña	0	21	6.36667	-18	43.332	-8.41595
Southwest	Spain	2019-07-19	Elviña	0	19	6.66667	-18	43.332	-8.41595
Southwest	Spain	2019-07-24	Elviña	0	22	6.83333	-16	43.332	-8.41595
Southwest	Spain	2019-08-05	Elviña	0	21	7.23333	-18	43.332	-8.41595
Southwest	Spain	2019-08-21	Elviña	0	22	7.76667	-19	43.332	-8.41595
Southwest	Spain	2020-06-09	Elviña	0	14.6	5.36667	-14	43.332	-8.41595
Southwest	Spain	2020-06-19	Elviña	0	20	5.7	-6	43.332	-8.41595
Southwest	Spain	2020-06-22	Elviña	0	19	5.8	-6	43.332	-8.41595
Southwest	Spain	2020-07-03	Elviña	0	16	6.16667	-6	43.332	-8.41595
Southwest	Spain	2020-07-13	Elviña	0	18	6.5	2	43.332	-8.41595
Southwest	Spain	2017-06-18	Féans	0	24	5.63333	-15	43.3233	-8.43492
Southwest	Spain	2017-07-02	Féans	0	16	6.1	-13	43.3233	-8.43492
Southwest	Spain	2017-07-12	Féans	0	16	6.43333	-15	43.3233	-8.43492
Southwest	Spain	2017-07-20	Féans	0	16	6.7	-9	43.3233	-8.43492
Southwest	Spain	2017-07-26	Féans	0	21	6.9	-27	43.3233	-8.43492
Southwest	Spain	2017-08-02	Féans	0	23	7.13333	-11	43.3233	-8.43492
Southwest	Spain	2018-07-06	Féans	0	21	6.23333	-2	43.3233	-8.43492
Southwest	Spain	2018-07-25	Féans	0	23	6.86667	-14	43.3233	-8.43492
Southwest	Spain	2018-08-03	Féans	0	23	7.16667	-23	43.3233	-8.43492
Southwest	Spain	2018-08-19	Féans	0	25	7.7	-11	43.3233	-8.43492
Southwest	Spain	2019-06-21	Féans	0	18	5.73333	-18	43.3233	-8.43492
Southwest	Spain	2019-07-03	Féans	0	23	6.13333	-11	43.3233	-8.43492
Southwest	Spain	2020-06-10	Féans	0	14	5.4	-16	43.3233	-8.43492
Southwest	Spain	2020-06-19	Féans	0	20	5.7	-12	43.3233	-8.43492
Southwest	Spain	2020-07-01	Féans	0	16	6.1	-12	43.3233	-8.43492
Southwest	Spain	2020-07-07	Féans	0	19	6.3	18	43.3233	-8.43492
Southwest	Spain	2020-07-13	Féans	0	18	6.5	3	43.3233	-8.43492
Southwest	Spain	2020-07-25	Féans	0	20	6.9	-4	43.3233	-8.43492
Southwest	Spain	2020-06-04	Ferrera park	0	16.7	5.2	-11	43.5534	-5.92123
Southwest	Spain	2020-06-10	Ferrera park	0	17	5.4	-15	43.5534	-5.92123
Southwest	Spain	2020-06-17	Ferrera park	0	17	5.63333	-15	43.5534	-5.92123
Southwest	Spain	2020-06-25	Ferrera park	1	17	5.9	-16	43.5534	-5.92123
Southwest	Spain	2020-07-02	Ferrera park	1	18	6.13333	-16	43.5534	-5.92123
Southwest	Spain	2020-07-09	Ferrera park	0	18	6.36667	-16	43.5534	-5.92123
Southwest	Spain	2020-07-22	Ferrera park	0	20	6.8	-16	43.5534	-5.92123
Southwest	Spain	2020-07-30	Ferrera park	0	23	7.06667	-17	43.5534	-5.92123
Southwest	Spain	2019-06-07	La Budellera	0	20	5.26667	-15	41.4187	2.10293
Southwest	Spain	2019-06-17	La Budellera	0	21	5.6	-14	41.4187	2.10293
Southwest	Spain	2019-06-21	La Budellera	0	22	5.73333	-14	41.4187	2.10293
Southwest	Spain	2019-07-09	La Budellera	0	24	6.33333	-13	41.4187	2.10293
Southwest	Spain	2019-07-18	La Budellera	0	26	6.63333	-14	41.4187	2.10293
Southwest	Spain	2019-07-22	La Budellera	0	26	6.76667	-11	41.4187	2.10293
Southwest	Spain	2019-07-26	La Budellera	0	30	6.9	-15	41.4187	2.10293
Southwest	Spain	2019-08-01	La Budellera	0	24	7.1	-15	41.4187	2.10293
Southwest	Spain	2020-06-05	La Budellera	0	21	5.23333	-14	41.4187	2.10293
Southwest	Spain	2020-06-09	La Budellera	0	16	5.36667	-14	41.4187	2.10293
Southwest	Spain	2020-06-11	La Budellera	0	21	5.43333	-16	41.4187	2.10293
Southwest	Spain	2020-06-18	La Budellera	0	19	5.66667	-15	41.4187	2.10293
Southwest	Spain	2020-06-26	La Budellera	0	27	5.93333	-14	41.4187	2.10293
Southwest	Spain	2020-07-04	La Budellera	0	24	6.2	-13	41.4187	2.10293
Southwest	Spain	2020-07-10	La Budellera	1	26	6.4	-15	41.4187	2.10293
Southwest	Spain	2020-07-16	La Budellera	0	23	6.6	-13	41.4187	2.10293
Southwest	Spain	2020-07-26	La Budellera	0	27	6.93333	-15	41.4187	2.10293
Southwest	Spain	2020-07-31	La Budellera	0	28	7.1	-13	41.4187	2.10293
Southwest	Spain	2020-06-10	Monte segade	1	17	5.4	-15	43.0038	-7.58827
Southwest	Spain	2020-06-14	Monte segade	0	16	5.53333	-16	43.0038	-7.58827
Southwest	Spain	2020-06-18	Monte segade	0	16	5.66667	-18	43.0038	-7.58827
Southwest	Spain	2020-06-25	Monte segade	0	17	5.9	-14	43.0038	-7.58827
Southwest	Spain	2020-07-03	Monte segade	0	17	6.16667	-14	43.0038	-7.58827
Southwest	Spain	2020-07-09	Monte segade	0	17	6.36667	-12	43.0038	-7.58827
Southwest	Spain	2020-07-19	Monte segade	1	19	6.7	-15	43.0038	-7.58827
Southwest	Spain	2020-07-26	Monte segade	0	24	6.93333	-14	43.0038	-7.58827
Southwest	Spain	2020-08-02	Monte segade	0	20	7.16667	-16	43.0038	-7.58827
Southwest	Spain	2017-06-22	Pontedeume	0	18	5.76667	-16	43.4273	-8.1336
Southwest	Spain	2017-06-25	Pontedeume	1	20	5.86667	-18	43.4273	-8.1336
Southwest	Spain	2017-07-20	Pontedeume	1	16	6.7	-15	43.4273	-8.1336
Southwest	Spain	2017-07-26	Pontedeume	1	19	6.9	-18	43.4273	-8.1336
Southwest	Spain	2017-07-30	Pontedeume	1	17	7.03333	-15	43.4273	-8.1336
Southwest	Spain	2017-08-03	Pontedeume	1	22	7.16667	-16	43.4273	-8.1336
Southwest	Spain	2018-07-09	Pontedeume	0	21	6.33333	-15	43.4273	-8.1336
Southwest	Spain	2018-07-15	Pontedeume	0	17.5	6.53333	-17	43.4273	-8.1336
Southwest	Spain	2018-07-22	Pontedeume	0	20	6.76667	-17	43.4273	-8.1336
Southwest	Spain	2018-08-07	Pontedeume	0	18	7.3	-16	43.4273	-8.1336
Southwest	Spain	2018-08-10	Pontedeume	0	21	7.4	-15	43.4273	-8.1336
Southwest	Spain	2020-06-20	Pontedeume	0	18	5.73333	-14	43.4273	-8.1336
Southwest	Spain	2020-06-22	Pontedeume	2	18	5.8	-13	43.4273	-8.1336
Southwest	Spain	2020-07-08	Pontedeume	0	19	6.33333	-11	43.4273	-8.1336
Southwest	Spain	2020-07-11	Pontedeume	0	19	6.43333	-14	43.4273	-8.1336
Southwest	Spain	2019-06-26	Portazgo	0	19	5.9	-17	43.3241	-8.38172
Southwest	Spain	2019-07-08	Portazgo	0	19	6.3	-16	43.3241	-8.38172
Southwest	Spain	2019-07-22	Portazgo	0	25	6.76667	-6	43.3241	-8.38172
Southwest	Spain	2019-08-03	Portazgo	0	22	7.16667	-12	43.3241	-8.38172
Southwest	Spain	2019-08-22	Portazgo	0	24	7.8	-15	43.3241	-8.38172
Southwest	Spain	2020-07-07	Portazgo	1	21	6.3	5	43.3241	-8.38172
Southwest	Spain	2020-07-18	Portazgo	0	24	6.66667	6	43.3241	-8.38172
Southwest	Spain	2020-07-30	Portazgo	0	20	7.06667	-1	43.3241	-8.38172
Southwest	Spain	2020-05-22	Río Jiloca - Calamocha	0	27	4.76667	-15	40.9172	-1.30328
Southwest	Spain	2020-05-31	Río Jiloca - Calamocha	0	16	5.06667	-11	40.9172	-1.30328
Southwest	Spain	2020-06-01	Río Jiloca - Calamocha	8	25	5.1	-12	40.9172	-1.30328
Southwest	Spain	2020-06-06	Río Jiloca - Calamocha	5	25	5.26667	-15	40.9172	-1.30328
Southwest	Spain	2020-06-10	Río Jiloca - Calamocha	12	17	5.4	-17	40.9172	-1.30328
Southwest	Spain	2020-06-14	Río Jiloca - Calamocha	13	22	5.53333	-17	40.9172	-1.30328
Southwest	Spain	2020-06-16	Río Jiloca - Calamocha	0	21	5.6	-18	40.9172	-1.30328
Southwest	Spain	2020-06-18	Río Jiloca - Calamocha	4	18	5.66667	-6	40.9172	-1.30328
Southwest	Spain	2020-06-24	Río Jiloca - Calamocha	1	24	5.86667	-15	40.9172	-1.30328
Southwest	Spain	2020-07-01	Río Jiloca - Calamocha	3	30	6.1	-17	40.9172	-1.30328
Southwest	Spain	2020-07-05	Río Jiloca - Calamocha	0	32	6.23333	-3	40.9172	-1.30328
Southwest	Spain	2020-07-11	Río Jiloca - Calamocha	0	28	6.43333	-16	40.9172	-1.30328
Southwest	Spain	2020-07-15	Río Jiloca - Calamocha	0	20	6.56667	-6	40.9172	-1.30328
Southwest	Spain	2020-07-26	Río Jiloca - Calamocha	0	31	6.93333	-3	40.9172	-1.30328
Southwest	Spain	2020-05-29	Río Jiloca - Luco de Jiloca	10	18	5	-15	40.9707	-1.31526
Southwest	Spain	2020-06-05	Río Jiloca - Luco de Jiloca	0	15	5.23333	-20	40.9707	-1.31526
Southwest	Spain	2020-06-11	Río Jiloca - Luco de Jiloca	9	18	5.43333	-23	40.9707	-1.31526
Southwest	Spain	2020-06-19	Río Jiloca - Luco de Jiloca	11	20	5.7	-26	40.9707	-1.31526
Southwest	Spain	2020-06-26	Río Jiloca - Luco de Jiloca	2	20	5.93333	-27	40.9707	-1.31526
Southwest	Spain	2020-07-05	Río Jiloca - Luco de Jiloca	0	20	6.23333	-26	40.9707	-1.31526
Southwest	Spain	2020-07-10	Río Jiloca - Luco de Jiloca	0	22	6.4	-24	40.9707	-1.31526
Southwest	Spain	2020-07-18	Río Jiloca - Luco de Jiloca	0	21	6.66667	-20	40.9707	-1.31526
Southwest	Spain	2020-06-15	Ruta das Chousas	1	15	5.56667	8	42.9915	-7.63028
Southwest	Spain	2020-06-20	Ruta das Chousas	0	15	5.73333	-1	42.9915	-7.63028
Southwest	Spain	2020-06-26	Ruta das Chousas	0	17	5.93333	1	42.9915	-7.63028
Southwest	Spain	2020-07-03	Ruta das Chousas	0	14	6.16667	-4	42.9915	-7.63028
Southwest	Spain	2020-07-11	Ruta das Chousas	0	19	6.43333	-1	42.9915	-7.63028
Southwest	Spain	2020-07-16	Ruta das Chousas	0	16	6.6	-3	42.9915	-7.63028
Southwest	Spain	2020-06-30	Xustáns	1	22.5	6.06667	-16	42.3848	-8.56326
Southwest	Spain	2020-07-05	Xustáns	0	25	6.23333	-17	42.3848	-8.56326
Southwest	Spain	2020-07-11	Xustáns	1	24.5	6.43333	-16	42.3848	-8.56326
Southwest	Spain	2020-07-17	Xustáns	0	28	6.63333	-17	42.3848	-8.56326
Southwest	Spain	2020-07-24	Xustáns	0	20	6.86667	-18	42.3848	-8.56326
Southwest	Spain	2020-07-31	Xustáns	0	19	7.1	-16	42.3848	-8.56326
Southwest	Spain	2020-06-24	Zuhatza	1	20	5.86667	-11	43.0986	-3.05091
Southwest	Spain	2020-06-30	Zuhatza	2	23	6.06667	-11	43.0986	-3.05091
Southwest	Spain	2020-07-05	Zuhatza	0	19	6.23333	-25	43.0986	-3.05091
Southwest	Spain	2020-07-11	Zuhatza	2	17	6.43333	-16	43.0986	-3.05091
Southwest	Spain	2020-07-13	Zuhatza	1	21	6.5	-22	43.0986	-3.05091
Southwest	Spain	2020-07-18	Zuhatza	2	25	6.66667	-13	43.0986	-3.05091
Southwest	Spain	2020-07-22	Zuhatza	0	22	6.8	-15	43.0986	-3.05091
Southwest	Spain	2020-07-27	Zuhatza	0	24	6.96667	-19	43.0986	-3.05091
